1 **Enemy or ally: a genomic approach to elucidate the lifestyle of *Phyllosticta***  
2 ***citrichinaensis***

3

4 Valerie A. Buijs<sup>1,2\*</sup>, Johannes Z. Groenewald<sup>1</sup>, Sajeet Haridas<sup>3</sup>, Kurt M. LaButti<sup>3</sup>,  
5 Anna Lipzen<sup>3</sup>, Francis M. Martin<sup>4</sup>, Kerrie Barry<sup>3</sup>, Igor V. Grigoriev<sup>3,5</sup>, Pedro W. Crous<sup>1,2</sup>,  
6 Michael F. Seidl<sup>6\*</sup>

7

8 <sup>1</sup>Evolutionary Phytopathology, Westerdijk Fungal Biodiversity Institute, Uppsalalaan 8, 3584  
9 CT Utrecht, The Netherlands

10 <sup>2</sup>Laboratory of Phytopathology, Wageningen University and Research, Droevendaalsesteeg  
11 1, 6708 PB Wageningen, The Netherlands

12 <sup>3</sup>US Department of Energy Joint Genome Institute, Lawrence Berkeley National Laboratory,  
13 Berkeley, CA, USA

14 <sup>4</sup>Institut National de la Recherche Agronomique, UMR INRA-université de Lorraine  
15 “Interaction Arbres/Microorganismes”, Champenoux, France

16 <sup>5</sup>Department of Plant and Microbial Biology, University of California Berkeley, Berkeley, CA,  
17 USA

18 <sup>6</sup>Theoretical Biology & Bioinformatics, Utrecht University, Padualaan 8, 3584 CH Utrecht, The  
19 Netherlands.

20

21 \*Corresponding authors.

22 V. A. Buijs, Westerdijk Fungal Biodiversity Institute, Uppsalalaan 8, 3584 CT Utrecht, The  
23 Netherlands. *E-mail address:* [v.buijs@wi.knaw.nl](mailto:v.buijs@wi.knaw.nl)

24 M. F. Seidl, Utrecht University, Padualaan 8, 3584 CH Utrecht, The Netherlands. *E-mail*  
25 *address:* [m.f.seidl@uu.nl](mailto:m.f.seidl@uu.nl)

26

## 27 **Abstract**

28 Members of the fungal genus *Phyllosticta* can colonize a variety of plant hosts, including  
29 several *Citrus* species such as *Citrus sinensis* (orange), *Citrus limon* (lemon), and *Citrus*  
30 *maxima* (pomelo). Some *Phyllosticta* species have the capacity to cause disease, such as  
31 Citrus Black Spot, while others have only been observed as endophytes. Thus far, genomic  
32 differences underlying lifestyle adaptations of *Phyllosticta* species have not yet been studied.  
33 Furthermore, the lifestyle of *Phyllosticta citrichinaensis* is ambiguous, as it has been described  
34 as a weak pathogen but Koch's postulates may not have been established and the presence  
35 of this species was never reported to cause any crop or economic losses. Here, we examined  
36 the genomic differences between pathogenic and endophytic *Phyllosticta* spp. colonizing  
37 *Citrus* and specifically aimed to elucidate the lifestyle of *Phyllosticta citrichinaensis*. We found  
38 several genomic differences between species of different lifestyles, including groups of genes  
39 that were only present in pathogens or endophytes. We also observed that species, based on  
40 their carbohydrate active enzymes, group independent of their phylogenetic association, and  
41 this clustering correlated with trophic prediction. *Phyllosticta citrichinaensis* shows an  
42 intermediate lifestyle, sharing genomic and phenotypic attributes of both pathogens and  
43 endophytes. We thus present the first genomic comparison of multiple citrus-colonizing  
44 pathogens and endophytes of the genus *Phyllosticta*, and therefore provide the basis for  
45 further comparative studies into the lifestyle adaptations within this genus.

46

## 47 **1 – Introduction**

48 Fungal and oomycete phytopathogens are a major threat to global food security (Fisher *et al.*  
49 2012). Despite many technological and methodological developments, such as the  
50 development of disease-resistant crops, this threat remains a pressing concern for humankind  
51 due to emergence of new or adapted species, and a lack of in-depth understanding of disease  
52 mechanisms and their genomic basis (Fudal *et al.* 2009; Singh *et al.* 2011; Fisher *et al.* 2012).

53

54 Plant associated fungi and oomycetes can be broadly classified as pathogens,  
55 endophytes, or saprotrophs, i.e., they are classified based on their capacity to cause disease  
56 symptoms. Furthermore, these microbes can be linked to five different trophic classes based  
57 on their specific feeding behavior (Kabbage *et al.* 2015). Necrotrophs are characterized as  
58 pathogens that feed on dead tissue, biotrophs as pathogens that feed on living tissue, and  
59 hemibiotrophs are pathogens that go through an initial biotrophic phase before switching to a  
60 necrotrophic phase (Oliver and Ipcho 2004). In the same classification model, non-pathogenic  
61 species that live within a plant are classified as endophytes, while species that live only on  
62 decaying plant material are referred to as saprotrophs. This classification model, which is  
63 mainly based on observational data, clearly has limitations, for instance when one species is  
64 classified as a necrotroph when interacting with one host but as biotroph when interacting with  
65 another (Veloso and Van Kan 2018). Consequently, much research in recent years has  
66 focused on establishing the genomic basis underlying differences between species that exhibit  
67 different lifestyles. Uncovering these genomic signatures would provide a more reliable  
68 method of classification and an increased understanding of host colonization and disease  
69 mechanisms, which is of significant importance in developing more effective disease  
70 management strategies (Haridas *et al.*, 2020; Möller and Stukenbrock, 2017; O'Connell *et al.*,  
71 2012; Ohm *et al.*, 2012; Plissonneau *et al.*, 2017; Spanu, 2012).

72

73 A common feature of various investigations into the genomic basis of pathogenicity is  
74 the identification of specific adaptations present in one lifestyle but absent or reduced in the  
75 other (Klosterman *et al.* 2011; Gardiner *et al.* 2012; Kim *et al.* 2016). A major current focus is  
76 the study of effectors, which are often defined as small secreted proteins that play an important  
77 role in establishing the interaction with the host, for instance by degrading the host cell wall or  
78 shielding the pathogen from detection by the host immune system (Rovenich *et al.* 2014; Lo  
79 Presti *et al.* 2015; Fouché *et al.* 2018). Effectors are often shared by strains and sometimes  
80 by species that colonize the same host (Chiapello *et al.* 2015; van Dam *et al.* 2017), and on  
81 rare occasions are even passed on to a separate species through horizontal gene transfer

82 (Gardiner *et al.* 2012; van Dam and Rep 2017). The identification of known effectors and other  
83 genes that are present only in species of a specific lifestyle can therefore provide useful  
84 information when studying the genomic basis of pathogenicity (Gibriel *et al.* 2016). However,  
85 as hosts rapidly evolve mechanisms to recognize effectors to re-establish immunity, effectors  
86 frequently mutate resulting in rapid effector diversification to avoid detection by the host  
87 immune system. Thus, effector repertoires in separate fungal lineages may differ significantly  
88 (Rovenich *et al.* 2014; Lo Presti *et al.* 2015).

89

90 Carbohydrate active enzymes (CAZymes) play diverse roles in degradation and  
91 biosynthesis of carbohydrates such as those found in plant cell walls. For example, plant  
92 pathogens can utilize CAZymes to penetrate the host cell wall to establish symbiosis and to  
93 liberate carbohydrates from host tissues for growth and reproduction (van den Brink and de  
94 Vries 2011; Kubicek *et al.* 2019). Thus, CAZymes can also contribute to virulence, and  
95 differences in CAZyme repertoires can mediate microbial lifestyle differences (ten Have *et al.*  
96 2002; King *et al.* 2011; Hane *et al.* 2020). Consequently, CAZymes have been used to propose  
97 new lifestyle classification models for oomycete and fungal species (Hane *et al.*, 2020). For  
98 instance, Hane and colleagues recently proposed five new trophic classes based on primary  
99 nutrient source preferences as approximated by the presence and abundance of CAZymes  
100 directly predicted from genome assemblies (Hane *et al.*, 2020): polymertrophs correspond  
101 best to necrotrophs, and have received their name due to a preference for polymeric  
102 carbohydrates as primary nutrient sources. In contrast, monomertrophs, which correspond  
103 best to symbionts and biotrophs, prefer monomeric primary nutrient sources. Mesotrophs are  
104 an intermediate group utilizing both monomeric and polymeric nutrient sources, and  
105 correspond best to hemibiotrophs. Vasculartrophs are similar to hemibiotrophs, but also  
106 include species commonly classified as wilts, anthracnoses, and rots. The saprotrophic class  
107 remains a separate group, encompassing species that feed mainly on decaying plant material.  
108 These new trophic classes were proposed based on a broad and phylogenetically diverse set  
109 of phytopathogenic fungi and oomycetes (Hane *et al.* 2020), including several members of

110 *Dothideomycetes*, a diverse class including many plant-associated fungi as well as fungi  
111 adapted to other lifestyles such as marine or soil environments (Haridas *et al.* 2020).

112

113         Within the *Dothideomycetes*, members of the genus *Phyllosticta* are particularly well  
114 suited to study the genomic basis of lifestyle adaptation and phytopathogenicity. *Phyllosticta*  
115 contains at least 50 species that are able to associate with a broad range of plant hosts (Wikee  
116 *et al.* 2013b), but species that colonize *Citrus* are of particular interest as they comprise both  
117 endophytes and pathogens while being phylogenetically closely related (Wikee *et al.* 2013b;  
118 Guarnaccia *et al.* 2019). The most well-known species of this genus is *Phyllosticta citricarpa*  
119 which causes Citrus Black Spot, a disease causing significant economic losses worldwide and  
120 which therefore has a quarantine status in Europe (Kotzé 2000; European Food Safety  
121 Authority 2014; Eustáquio Lanza *et al.* 2018). *Phyllosticta paracitricarpa* is closely related to  
122 *P. citricarpa*, bears a strong morphological resemblance and appears to cause similar disease  
123 symptoms on citrus (Guarnaccia *et al.* 2017). Other pathogens include *P. citriasiana*,  
124 described from several citrus hosts in Asia, *P. citrimaxima*, described from *Citrus maxima* in  
125 Thailand, and *P. citrichinaensis*, described as a weak pathogen from several citrus hosts in  
126 China (Wulandari *et al.* 2009; Wang *et al.* 2012; Wikee *et al.* 2013b). Endophytic species within  
127 the genus are *P. capitalensis* with a very broad host range and present on all continents, *P.*  
128 *paracapitalensis*, known from citrus in Europe, and *P. citribraziliensis*, currently known only  
129 from citrus in Brazil (Glienke *et al.* 2011; Wikee *et al.* 2013a; Guarnaccia *et al.* 2017).

130

131         Genomes were recently published for *P. capitalensis*, *P. citriasiana*, *P. citribraziliensis*,  
132 *P. citricarpa*, *P. citrichinaensis*, and *P. paracitricarpa*, with genome sizes ranging between 29–  
133 32 Mb (Guarnaccia *et al.* 2019). These genomes pave the way for comparative genomic  
134 studies aimed to disentangle lifestyle differences within the genus *Phyllosticta* (Guarnaccia *et*  
135 *al.* 2019). Although both mating types (MAT1-1 and MAT1-2) are reported to exist for both  
136 endophytic and pathogenic species (Guarnaccia *et al.* 2019; Petters-Vandresen *et al.* 2020),  
137 the pathogenic strains for which genomes have been published are all heterothallic and only

138 of the MAT1-2 mating type. In contrast, the sequenced strain of the endophytic *P.*  
139 *citribraziliensis* is heterothallic and of the MAT1-1 mating type, while the other sequenced  
140 endophyte, *P. capitalensis*, is homothallic and therefore contains both mating types genes  
141 (Guarnaccia *et al.* 2017, 2019; Petters-Vandresen *et al.* 2020). *Phyllosticta citrichinaensis* is  
142 also homothallic, but the MAT1-2 idiomorph in *P. citrichinaensis* is present in a separate  
143 location from the mating type locus (Petters-Vandresen *et al.* 2020). This phenomenon sets  
144 *P. citrichinaensis* apart from the other species in the genus as the configuration of the mating  
145 type locus is typically very conserved amongst *Phyllosticta* species (Petters-Vandresen *et al.*  
146 2020).

147

148 Previous comparative analyses between pathogenic and endophytic *Phyllosticta* spp.  
149 have been hampered by the quality of genomes and the availability of only a single endophyte  
150 genome (*P. capitalensis*), which was relatively distantly related to the species it was compared  
151 to, and consequently genomic adaptations towards these two broad lifestyles remained  
152 unclear (Wikee *et al.* 2013b; Rodrigues *et al.* 2019; Wang *et al.* 2020). Therefore, a  
153 comparison of new and high-quality genomes which includes multiple species of different  
154 lifestyles could provide the necessary foundation to finally discovering the genomic  
155 underpinning for phytopathology in *Phyllosticta*, which is essential for the development of  
156 better disease management strategies.

157

158 *Phyllosticta citrichinaensis* was originally described as a weakly aggressive pathogen  
159 of several citrus hosts in China as it was isolated from freckles or spots on fruits or leaves of  
160 citrus (Wang *et al.* 2012). However, lesions never exhibited typical pycnidia, the presence of  
161 this species was never reported to cause any crop or economic losses and Koch's postulates  
162 may not have been established (Wang *et al.* 2012), and thus its lifestyle remains ambiguous.  
163 *P. citribraziliensis* is a very close relative of *P. citrichinaensis* and has been described only as  
164 an endophyte from Brazil. Therefore, if these two species were certain to be of two different  
165 lifestyles, these species would be ideal to study pathogenicity in *Phyllosticta*. As the genome

166 of *P. citrichinaensis* has not been included in earlier comparative work focused on lifestyle  
167 differences (Rodrigues *et al.* 2019; Wang *et al.* 2020), a thorough study of its genome and  
168 comparison to the genomes of the other species in this genus could provide valuable  
169 information on this species' lifestyle as well as genomic underpinning of disease mechanisms  
170 of other species in this genus. Here, we present the first comparative genomics study using  
171 multiple complete genomes of two endophytic and three phytopathogenic *Phyllosticta* species  
172 and established genomic differences between species of different lifestyles within this genus.  
173 In addition, we use these data in an attempt to elucidate the lifestyle of the ambiguous *P.*  
174 *citrichinaensis*.

175

## 176 **2 - Materials and Methods**

### 177 **2.1 – Sequencing, annotation, genome quality and availability**

178 All non-*Phyllosticta* genomes were previously published (Haridas *et al.* 2020) and are  
179 available on MycoCosm (<https://mycocosm.jgi.doe.gov/Dothideomycetes>; Grigoriev *et al.*,  
180 2014). The database identifiers (DBIDs) that are given by the Joint Genome Institute (JGI) to  
181 identify specific genomes, and which can be used to access the genome's online portal  
182 (<https://mycocosm.jgi.doe.gov/DBID>, e.g., <https://mycocosm.jgi.doe.gov/Aaoar1>) are listed in  
183 Suppl. Table 1. Seven of the eight *Phyllosticta* genomes included in our analyses were also  
184 previously published (Guarnaccia *et al.* 2019), and are available on MycoCosm  
185 ([mycocosm.jgi.doe.gov/Phyllosticta](https://mycocosm.jgi.doe.gov/Phyllosticta)).

186

187 *Phyllosticta citrichinaensis* liquid cultures (250 ml Malt peptone broth in 500 ml  
188 Erlenmeyer flasks) were incubated at 25 °C and 180 rpm for 10 to 14 days, after which  
189 genomic DNA was isolated using the Qiagen Genomic-tip 100/G kit and the Qiagen Genomic  
190 DNA Buffer Set. The genome assembly of *P. citrichinaensis* genome (CBS 129764) was  
191 generated by the JGI using the PacBio long-read sequencing technology. Long-read  
192 sequencing data was assembled using Flye and the genome assembly was annotated using  
193 the JGI Annotation pipeline (Grigoriev *et al.* 2014). The genome assembly and annotation are

194 available via the MycoCosm platform (<https://mycocosm.jgi.doe.gov/Pcit129764>). Quality  
195 assessments were performed using BUSCO 4.1.4 (Manni *et al.* 2021) and QUAST 5.0.2  
196 (Gurevich *et al.* 2013) using default parameters. One-to-one whole-genome comparisons  
197 were performed using PROmer (default settings), which is part of the MUMMer 3.25 conda  
198 package (Marçais *et al.* 2018) and plotted with mummerplot using the --filter and --fat  
199 parameters. We used OrthoFinder 2.2.6 (Emms and Kelly 2019) to identify ortholog groups  
200 (OGs) across all 116 fungal genome annotations (Suppl. Table 2A). Ortholog groups unique  
201 to species of a specific lifestyles were identified using UpSetR (Suppl. Table 2B, Conway *et*  
202 *al.*, 2017).

203

## 204 **2.2 – Secreted proteins and effectors**

205 We used SignalP 5.0b Linux x86\_64 (Almagro Armenteros *et al.*, 2019) to predict secreted  
206 proteins in the predicted proteomes of all 116 fungal genomes, and subsequently applied  
207 EffectorP 2.0 (Sperschneider *et al.* 2016) to predict effectors within the secretomes. We  
208 visualized the distribution of OGs of which 50% or more of the genes were predicted to be a  
209 secreted protein or an effector, by generating a clustered heatmap in R using the  
210 ComplexHeatmap package (Gu *et al.* 2016).

211

## 212 **2.3 – Carbon utilization and CATAstrophy**

213 Carbon growth studies were performed as described previously (Buijs *et al.* 2021). In short,  
214 1-mm-diameter plugs from 2-week-old colony edges of *Phyllosticta* species were inoculated  
215 on 35 different carbon sources and incubated at 25 °C until the largest colony reached the  
216 edge of a 35-mm-diameter plate. As different *Phyllosticta* species demonstrate different  
217 growth speeds, this moment fell on different days after inoculation (between five and ten days).  
218 When the largest colony of a species reached the edge of a plate, colony diameters were  
219 measured on all sources and images were taken using a standard camera setup. This  
220 approach was chosen to be able to compare species with different growth speeds. All growth  
221 studies were performed in duplicate. Measurements were averaged and used to generate a



222 clustered heatmap using the ComplexHeatmap package (Gu *et al.* 2016) in R (R Core Team,  
223 2021).

224

225 We used CATAstrophy to predict lifestyles from CAZyme repertoires (Hane *et al.*  
226 2020). To this end, we first used hmmpress to generate a local HMMER database of dbCAN  
227 8 (Zhang *et al.* 2018). We then queried all 116 predicted proteomes with the local dbCAN  
228 HMMs database using hmmscan with the `--domtblout` parameter to create a domain table for  
229 each proteome. CATAstrophy was then ran on all 116 domain tables using parameters `-p, -c,`  
230 `--model v8` and `--format hmmer_domtab`. The heatmap was created by identifying all OGs (as  
231 created previously using OrthoFinder) that contained a CAZyme, counting the number of  
232 genes in each OG for each species, and then generating a heatmap using the  
233 ComplexHeatmap package in R. Empty columns, e.g. CAZyme families for which no genes  
234 present in these species, were filtered out of the heatmap for visualization purposes, but are  
235 present in the original data (Suppl. Table 5).

236

### 237 **3 - Results**

#### 238 **3.1 – *Phyllosticta* genome assemblies are of high quality**

239 Lifestyle differences are often driven by genomic adaptations (Ohm *et al.* 2012; Kabbage *et*  
240 *al.* 2015; Haridas *et al.* 2020), and we hypothesize that this also applies to *Phyllosticta* species  
241 with different lifestyles. Taxonomically, *Phyllosticta* belongs to *Dothideomycetes*, a fungal  
242 class with extensive genomic resources (Wikee *et al.* 2013b; Haridas *et al.* 2020). To enable  
243 studies in lifestyle differences in *Phyllosticta*, we made use of eight *Phyllosticta* genome  
244 sequences, seven of which were assembled and published previously (Guarnaccia *et al.* 2017,  
245 2019). Here, we performed genome sequencing of *P. citrichinaensis* (CBS 129764), which is  
246 the second genome of this species to be sequenced, thereby enabling us to also evaluate  
247 intra-species variation. We included two genome assemblies of *P. citrichinaensis*, as well as  
248 the genome assemblies of the endophyte *P. citribraziliensis*, the closest relative of *P.*  
249 *citrichinaensis*, those of the two pathogenic species *P. citricarpa* and *P. paracitricarpa*, which

250 are very closely related (Fig. 1A, also see Guarnaccia et al., 2019), of the pathogenic species  
251 *P. citriasiana*, and of the endophyte *P. capitalensis*, which is phylogenetically the least related  
252 to the other *Phyllosticta* species (Fig. 1A). As these genome assemblies include multiple  
253 species of both lifestyles (pathogens and endophytes), comparative genomics may reveal the  
254 genomic underpinning for lifestyle adaptations within this genus, and ultimately aid in  
255 determining the lifestyle of *P. citrichinaensis*.

256

257 To determine genome assembly size, fragmentation, and annotation completeness of  
258 the *Phyllosticta* genomes, we used QUAST (Gurevich et al. 2013) and BUSCO (Manni et al.  
259 2021), and compared the results to 100 previously published *Dothideomycete* genomes as  
260 well as eight genomes of fungal species outside of *Dothideomycetes* (Fig. 1A; Suppl. Table  
261 1, Haridas et al., 2020). Compared to the other fungal species, *Phyllosticta* genome  
262 assemblies are of a slightly smaller size (29–32 Mb) as opposed to an average of 40 Mb in  
263 other *Dothideomycetes* (Fig. 1A). The *Phyllosticta* genome assemblies have a low number of  
264 contigs, namely 14 to 152 contigs compared with on average 471 contigs, and BUSCO scores  
265 between 93.3% and 95.8%, suggesting that the *Phyllosticta* genome assemblies are *en par*  
266 or above average quality in terms of genome contiguity and completeness compared to the  
267 other *Dothideomycetes* genomes, which should facilitate further comparative analyses.

268

### 269 **3.2 – *Phyllosticta* species show mesosynteny to species within the *Dothideomycetes***

270 *Dothideomycetes* are known to show different patterns of genome conservation as compared  
271 to other fungal classes: intra-chromosomal rearrangements lead to a seemingly random  
272 reshuffling of gene content within individual chromosomes, while genes themselves remain  
273 well conserved (Hane et al. 2011; Ohm et al. 2012), a pattern that has previously been named  
274 mesosynteny (Hane et al. 2011). To study the gene order conservation in *P. citrichinaensis*  
275 and in other *Phyllosticta* species compared with other fungal genomes, we performed whole-  
276 genome alignments of *P. citrichinaensis* to all other *Phyllosticta* and to two more distantly  
277 related fungi (Fig. 1B). When comparing the two *P. citrichinaensis* strains, we observed a clear

278 pattern of macrosynteny with only a few inversions and translocations (Fig. 1B); a similar  
279 pattern could also be observed when comparing *P. citrichinaensis* to *P. citricarpa* (Fig. 1B)  
280 and *P. citribraziliensis* (Suppl. Fig. 1A). Interestingly, when comparing *P. citrichinaensis* to *P.*  
281 *capitalensis*, which is a more distantly related member of this genus (Fig. 1A), we observed  
282 an increased frequency of chromosomal rearrangements (mainly intra-chromosomal  
283 inversions with only few inter-chromosomal translocations), suggesting that these species are  
284 mesosyntenic (Fig. 1B). As expected, when moving (phylogenetically) further away from *P.*  
285 *citrichinaensis* and comparing its genome sequence to the one of *Lophium mytilinum*, a  
286 relatively obscure fungus from the order *Mytilinidiales* (*Dothideomycetes*) (Fig. 1A), a clear  
287 pattern of mesosyteny can be observed (Fig. 1B). When comparing *P. citrichinaensis* to  
288 *Neurospora crassa*, a species from the class *Sordariomycetes*, we only observed weak  
289 mesosyteny with the pattern apparently dissipating (Suppl. Fig. S1). Thus, our results clearly  
290 demonstrate gradually changing patterns of mesosyteny across progressively more distantly  
291 related species within the *Dothideomycetes*, but possibly also outside of this taxonomic class.  
292 Furthermore, we show that species within the genus *Phyllosticta* spur the mesosyntenic mode  
293 of evolution that has previously been described for other *Dothideomycetes* (Hane *et al.* 2011;  
294 Ohm *et al.* 2012).  
295

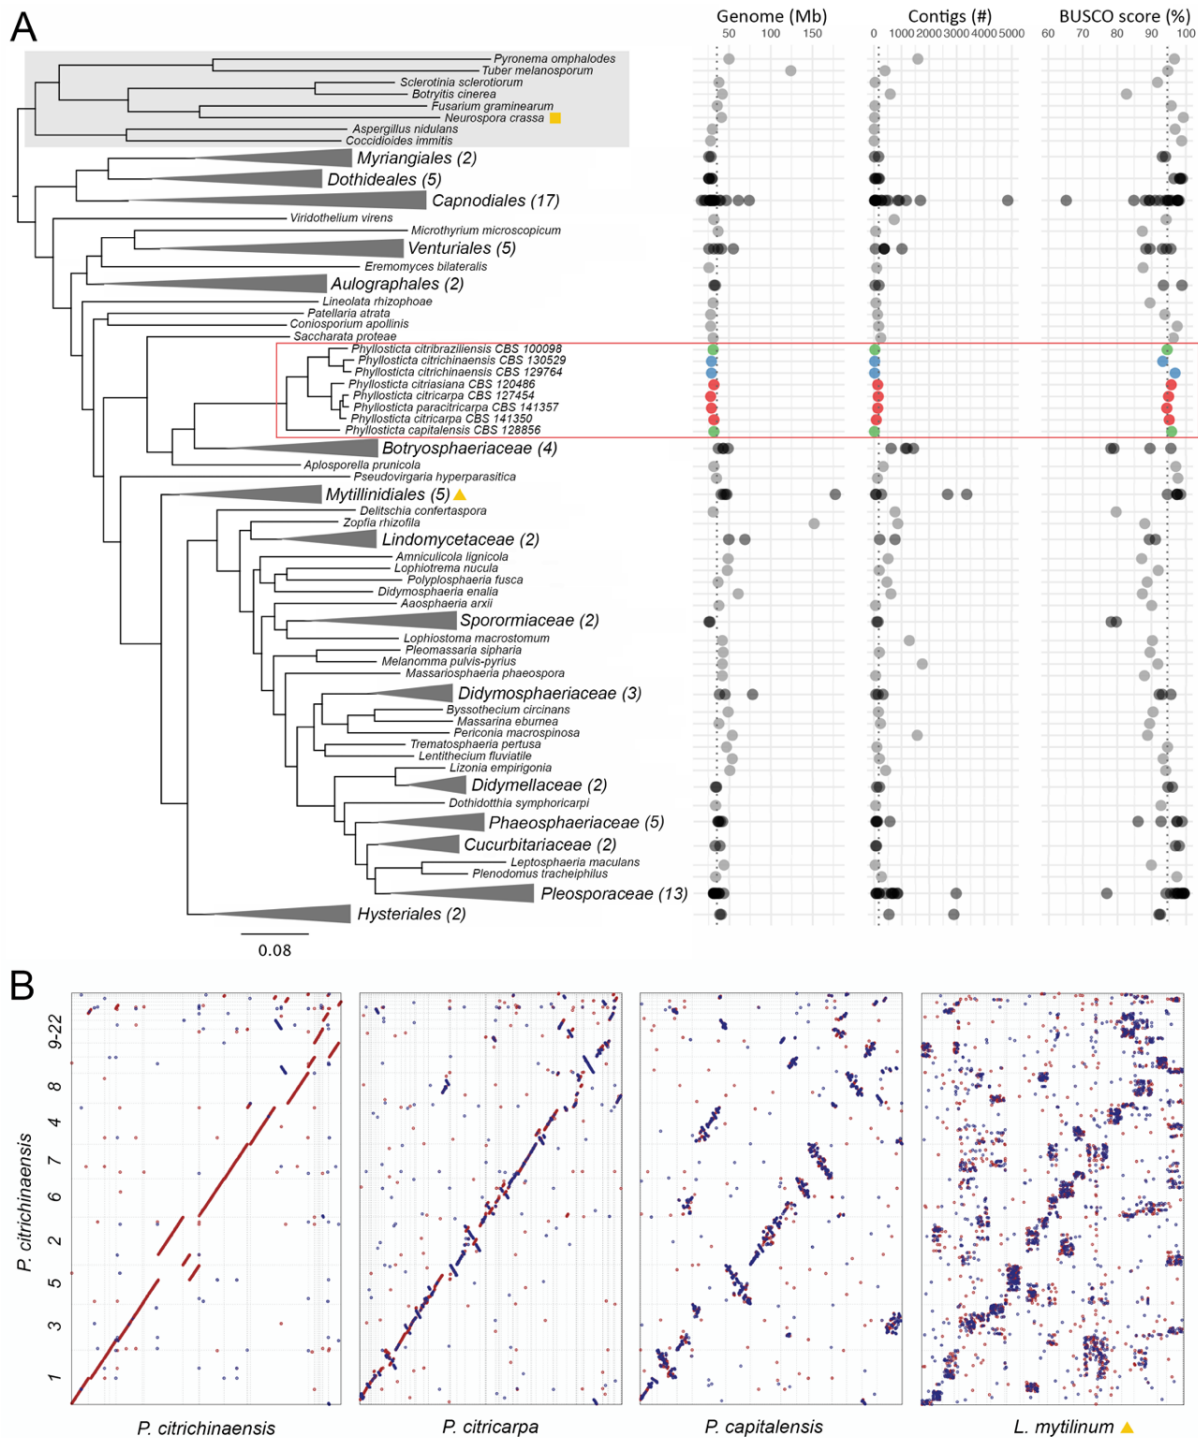

296

297 **Figure 1. *Phyllosticta* genomes are of high quality and show mesosynteny.** **A.** The  
 298 phylogenetic relationship of more than 100 fungal species (116 genomes) is shown. The  
 299 phylogenetic tree was generated using OrthoFinder, and sub-trees were collapsed manually  
 300 to enhance readability. Grey box indicates species outside the *Dothideomycetes*, red  
 301 rectangle indicates the genus *Phyllosticta*. Red orbs = *Phyllosticta* pathogens, green orbs =  
 302 *Phyllosticta* endophytes, blue orbs = *P. citrichinaensis*. Yellow triangle and square indicate the  
 303 locations of *Lophium mytilinum* and *Neurospora crassa*, respectively. **B.** Whole-genome  
 304 alignments between *P. citrichinaensis* and *P. citricarpa*, *P. capitalensis*, and *L. mytilinum*,  
 305 respectively, were generated using PROmer; the red line/dot = homologous area and the blue  
 306 line/dot = reversed homologous area.  
 307

### 308 **3.3 – *Phyllosticta* differ in gene number and functional annotation in a lifestyle** 309 **dependent manner**

310 Species of similar lifestyles often share (groups of) genes (Lo Presti *et al.* 2015; Kim *et al.*  
311 2016). Consequently, we hypothesized that the presence or absence of specific genes may  
312 provide information about the (predominant) lifestyle of *P. citrichinaensis*. To be able to  
313 compare gene content over different species and strains, we used OrthoFinder (Emms and  
314 Kelly 2019) to identify ortholog groups (OGs) across all 116 predicted proteomes. Orthofinder  
315 identified 35,379 OGs containing 88.1% of all genes (Suppl. Table 2A). The 11.9% of genes  
316 that were not assigned to any OG likely constitute species-specific genes, which is to be  
317 expected given the taxonomically diverse set of fungal species considered in our study (Fig.  
318 1A). In total, 1,794 OGs (5.1%) contained genes from all species, representing a fungal core  
319 genome. Of all OGs, 32.2% (11,352) contained at least one gene from a *Phyllosticta* species,  
320 and of those, 57.8% (6,558, Fig. 2) contained genes from all *Phyllosticta* species and 33.2%  
321 (3,764) were unique to *Phyllosticta* (i.e., they only contained *Phyllosticta* genes). The latter  
322 percentage is quite high because of the close taxonomic relation of some of the genomes: a  
323 rather large fraction of the *Phyllosticta* unique OGs contain two or three genes (2,734, 72.6%),  
324 as these often contain one gene from each of the two *P. citricarpa* genomes and one more  
325 gene from *P. paracitricarpa*. Genes that are unique to a species, i.e., sequences that are  
326 sufficiently different from other sequences, do not form a separate OG on their own and  
327 consequently are not considered in these statistics. Since the *P. citricarpa* and *P.*  
328 *paracitricarpa* genomes are so closely related, many of their “unique genes” are assigned to  
329 an OG, which causes the fraction of *Phyllosticta* unique OGs to be quite large.

330

331 To discover lifestyle-associated genes in *Phyllosticta*, we compared OG content  
332 across the eight *Phyllosticta* species and sought to identify differences between species of  
333 different lifestyles. The number of OGs that is shared by *Phyllosticta* species of a specific  
334 lifestyle (45–222, Fig. 2 and Suppl. Table 2B) is much smaller than the total number of OGs  
335 that all species in this genus share (6,558). The OGs shared by *Phyllosticta* spp. of a specific

336 lifestyle might also contain genes from species outside of this genus. *Phyllosticta* pathogens  
337 shared 222 OGs that are not present in *Phyllosticta* endophytes, a much higher number than  
338 the total of 45 OGs that are shared by endophytes and not present in pathogens, which is  
339 likely due to the larger phylogenetic distance between the two endophytes compared with the  
340 pathogenic *Phyllosticta* species (Fig. 1A). In addition to OGs that are unique to species of a  
341 specific lifestyle, OGs that are present in all species but differ in their abundance in species  
342 that share a lifestyle (e.g., there are more genes in species of one lifestyle compared to the  
343 others) may provide information on how species adapt to their lifestyles. We thus identified  
344 OGs for which the average number of genes in species of one lifestyle was higher than the  
345 average number of genes for species of the other lifestyle; we did not consider OGs that  
346 contained large outliers, i.e., one species having a much larger number of genes as compared  
347 to the other species. This resulted in a total of 87 OGs: 73 OGs that had more genes in  
348 endophytes and 14 OGs that had more genes in pathogens (Suppl. Table 2C), suggesting  
349 that achieving the endophytic lifestyle requires additional genes.

350

351 As functions of genes in OGs that are unique to, or enriched in, species of a certain  
352 lifestyle may underly lifestyles adaptations, and this may help to uncover which lifestyle *P.*  
353 *citrichinaensis* has, we looked into the annotations of the lifestyle-related OGs. In addition to  
354 the annotations of *Phyllosticta* genes, we also included the annotations of 50 out of the 108  
355 species outside the genus *Phyllosticta* for which annotation data was available on the JGI  
356 database. The number of OGs in which at least one gene was functionally annotated (other  
357 than as hypothetical or expressed protein) varied widely between different lifestyle-related  
358 groups: while nearly 50% of the OGs that had more genes in endophytes received an  
359 annotation, less than 3% of the pathogen-only group did (Suppl. Table 3A–F). We further  
360 divided the individual functional annotations into KOG-classes (from the EuKaryotic  
361 Orthologous Groups tool, <https://mycocosm.jgi.doe.gov/help/kogbrowser.jsf>), which provide a  
362 high-level classification system to group genes with comparable activities. Of all KOG-classes,

363 the class ‘Secondary metabolites biosynthesis, transport and catabolism’ was most often  
364 found to be associated with lifestyle-related OGs: only two of six lifestyle-related groups did  
365 not contain genes in this class, suggesting this group of genes may be useful to distinguish  
366 species of different lifestyles (Suppl. Table 3I).

367

368 To study secondary metabolite biosynthesis genes in more detail we used antiSMASH  
369 (Blin *et al.* 2019) to identify biosynthetic gene clusters (BGCs) in the eight *Phyllosticta*  
370 genomes. The total number of predicted BGCs varied from 20 in *P. paracitricarpa* to 24 in *P.*  
371 *citricarpa*, with no apparent differences between species of different lifestyles. Interestingly,  
372 one of the terpene clusters was predicted as a squalastatin in all pathogenic species, while it  
373 received no functional prediction in the endophytic species or in *P. citrichinaensis*, suggesting  
374 there is a difference in this cluster between species of different lifestyles. Squalostatins are  
375 predicted to be inhibitors of squalene synthase, which produces squalene, a sterol  
376 biosynthetic intermediate that is reported to play a role in mediating interactions between fungi  
377 and their plant hosts (Lindo *et al.* 2020). Therefore, further characterization of this BGC and  
378 others in *Phyllosticta* will be worthwhile for future studies into pathogenicity of *Phyllosticta*  
379 species.

380

381 Ortholog groups with more genes in *Phyllosticta* endophytes were more often  
382 functionally annotated, suggesting that these are generally better characterized and likely  
383 evolutionary conserved. We did not find any particular KOG-class to be annotated in higher  
384 abundance in endophytes, but nonetheless found a few interesting annotated OGs, such as  
385 six OGs that were annotated to belong to the ‘carbohydrate transport and metabolism’ class  
386 including a CAZyme family (GH55) gene and several transporters, suggesting a role for  
387 carbohydrate transport in lifestyle (Suppl. Table 3A–F, I). One endophyte-only OG contained  
388 the MAT1-1 gene, which was the result of all sequenced pathogenic strains having MAT1-2  
389 mating types (Petters-Vandresen *et al.* 2020). In addition, although the *P. citrichinaensis*  
390 MAT1-1 gene is not present in this OG, we did find the MAT1-1 gene in the *P. citrichinaensis*

391 genome assembly and found it to be highly similar to that of *P. citribraziliensis*, its closest  
 392 relative.

393

394 The pathogen-only group was poorly functionally annotated; out of 222 OGs, only five  
 395 received a functional annotation. The fact that such a large fraction of OGs could not be  
 396 assigned a functional annotation is of interest as some of the non-annotated OGs in the  
 397 pathogen-only group could contain putative effectors or genes that are otherwise involved in  
 398 virulence, as effectors often remain unannotated in standard annotation pipelines  
 399 (Sperschneider *et al.* 2015). In addition, two OGs received functional annotations that have  
 400 previously been implied to be virulence factors and could therefore be interesting targets for  
 401 future functional studies; a pectin lyase fold (Yang *et al.* 2018), and a cytochrome p450  
 402 (Siewers *et al.* 2005; Shin *et al.* 2017).

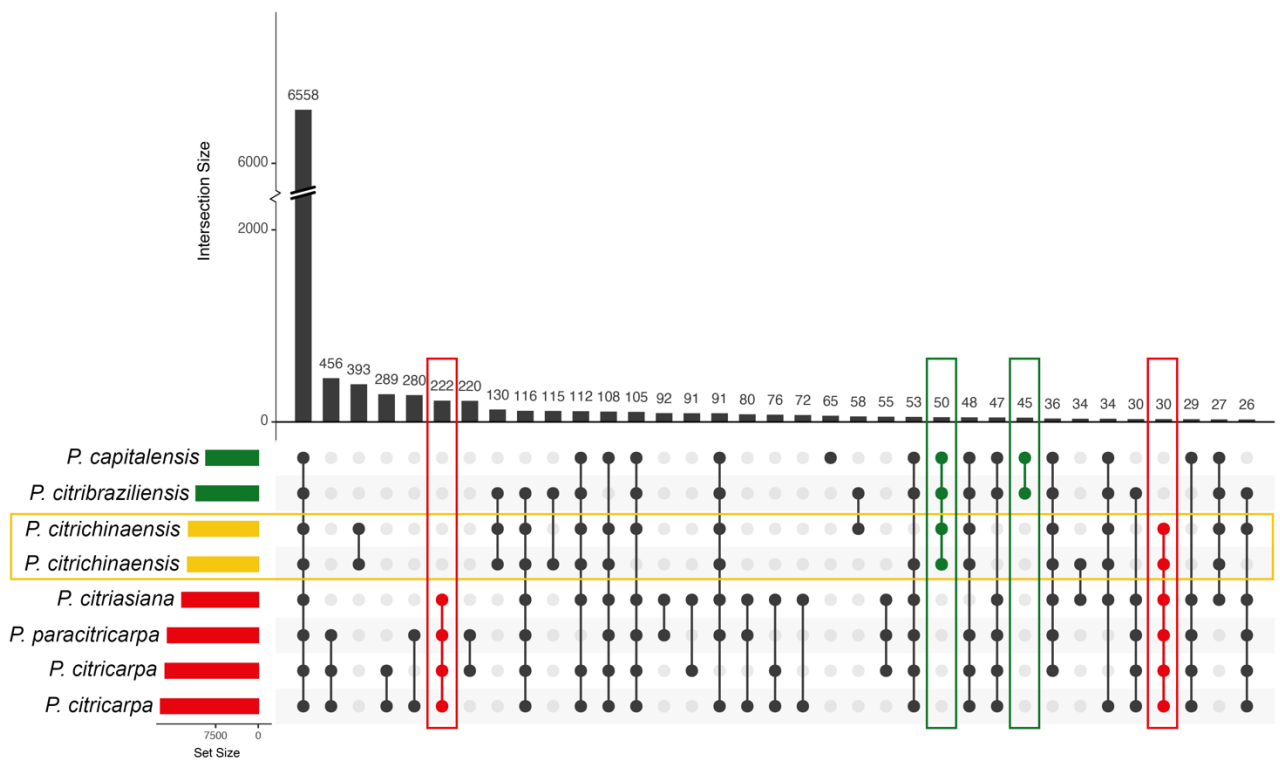

403

404 **Figure 2. *Phyllosticta citrichinaensis* shares more unique OGs with endophytes than**  
 405 **with pathogens, but pathogens share more OGs with each other.** Yellow rectangles = *P.*  
 406 *citrichinaensis*, red rectangles = pathogens, green rectangles = endophytes. Figure generated  
 407 using UpSetR.  
 408



409 **3.4 – *Phyllosticta citrichinaensis* shares more lifestyle-specific OGs with endophytes,**  
410 **but follows an intermediate pattern in other lifestyle-associated OGs**

411 The lifestyle of *P. citrichinaensis* is currently ambiguous (Wang *et al.* 2012), but the number  
412 of OGs that it shares with species of either lifestyle may provide clarity not only about the  
413 lifestyle of *P. citrichinaensis* itself but also about the differences between species of different  
414 lifestyles within this genus. The two *P. citrichinaensis* strains share more lifestyle specific OGs  
415 with endophytes (50) than they do with pathogens (30). In addition, the number of OGs that is  
416 shared by only the two endophytes and *P. citrichinaensis* is larger than the number of  
417 endophyte-only OGs that are not shared with *P. citrichinaensis* (Fig. 2, green rectangles),  
418 suggesting that *P. citrichinaensis* indeed compared well to endophytic species. However, for  
419 30 out of 87 OGs that contained more genes in either pathogenic or endophytic species, the  
420 *P. citrichinaensis* gene numbers corresponded best to the endophytic numbers, while in 32  
421 OGs, they corresponded to the pathogenic numbers. In 25 OGs, the number of genes of *P.*  
422 *citrichinaensis* corresponded to neither lifestyle (Suppl. Table 2C). As opposed to the numbers  
423 of OGs specific to species of one lifestyle, where *P. citrichinaensis* shared more with  
424 endophytes (Fig. 2), the numbers of *P. citrichinaensis* genes in OGs that contained more  
425 genes in either pathogenic or endophytic species thus indicate that it compares equally well  
426 to species of either lifestyle. Thus, this data suggests that presence/absence and/or gene  
427 abundance differences are not sufficient to provide insights into the lifestyle of *P.*  
428 *citrichinaensis*.

429

430 While we did not observe clear patterns in the types of functions that *P. citrichinaensis*  
431 shares with either endophytes or pathogens, we nevertheless could observe some interesting  
432 functional patterns in *P. citrichinaensis* (Suppl. Table 3G–H). For instance, two groups were  
433 annotated as heat shock proteins: an Hsp40 (DNAJC17) that had more genes in pathogens  
434 (3 in pathogens vs 1–2 in endophytes) as well as an Hsp70 that had more genes in endophytes  
435 (4–5 in pathogens vs 6–7 in endophytes). *Phyllosticta citrichinaensis* contains fewer genes in  
436 both groups, suggesting it may respond differently to stress. Furthermore, one group that had

437 more genes in pathogens as well as in *P. citrichinaensis* (1 in endophytes versus 2–3 in  
438 pathogens) contains genes annotated as peroxiredoxin-1 or peroxiredoxin-6. Peroxiredoxins  
439 are necessary for full virulence in several fungal pathogens such as *Magnaporthe oryzae* and  
440 *Aspergillus fumigatus* as they offer an antioxidant defense against reactive oxygen species  
441 produced by the host as part of host defense responses (Mir *et al.* 2015; Rocha *et al.* 2018).  
442 It is thus possible that these additional genes in *Phyllosticta* pathogens and in *P.*  
443 *citrichinaensis* contribute to their virulence.

444

### 445 **3.5 – There is little difference between *Phyllosticta* endophytes and pathogens in the** 446 **numbers of putative secreted proteins and putative effectors**

447 Secreted proteins, including effectors, play an important role in lifestyle and virulence (de Wit  
448 *et al.* 2009; Lo Presti *et al.* 2015; Plissonneau *et al.* 2017). Based on the comparison of OGs  
449 in species of different lifestyles, we concluded that pathogenic species contain a large number  
450 of unannotated genes in pathogen-specific OGs (217 OGs). We hypothesized that some of  
451 these genes may be effectors or other secreted proteins, and that the presence of putative  
452 secreted proteins and effectors in the genomes of species may be an indicator for lifestyle  
453 differences. We therefore assessed the presence of OGs that contain 50% or more putative  
454 secreted or effector proteins in all 116 species used in this study. A total of 3,942 OGs (11%  
455 of 35,379 OGs) consisted of at least 50% secreted proteins (Fig. 3A, Suppl. Table 4A) and of  
456 these, 1,048 OGs consisted of at least 50% effectors (Fig. 3B, Suppl. Table 4B). Notably, only  
457 62 OGs containing putatively secreted genes were present in all 116 species, and only one  
458 OG containing putative effectors contained genes from all 116 species, corroborating that  
459 secreted proteins and effectors are typically not shared between different species and  
460 especially effectors are rather species and/or strain specific (Stergiopoulos *et al.* 2012).

461

462 *Phyllosticta* genes were present in a total of 762 putatively secreted OGs, with 432 of  
463 those containing genes from all *Phyllosticta* species included in this study. With an average of  
464 786 genes per species, *Phyllosticta* species contain less genes in OGs encoding secreted

465 proteins compared with other *Dothideomycetes* (an average of 1,033 genes, Suppl. Table 4).  
466 In addition, *Phyllosticta* species contained on average 110 putatively secreted genes that were  
467 not in an OG or that were the only protein predicted to be secreted in an OG (singletons),  
468 which is also less than we observed for the overall average of 128 singleton secreted genes  
469 (Suppl. Table 4). When assessing the total number of predicted secreted genes (both in OGs  
470 and singletons), *Phyllosticta* endophytes have more putative secreted proteins (average of  
471 913) as compared to *Phyllosticta* pathogens (average of 897). However, when considering  
472 these as a percentage of the total predicted proteome size, this difference becomes negligible,  
473 with endophytes having a slightly smaller percentage of proteins that is secreted (7.89%) as  
474 compared to pathogens (8.01%, Suppl. Table 4C). We found 247 putatively secreted OGs to  
475 be unique to *Phyllosticta* (Fig. 3A), which mainly represent genes encoding proteins without  
476 predicted functions such as those often found to be putative effectors (Suppl. Table 4G, Lo  
477 Presti *et al.* 2015). Namely, only four out of 247 OGs contained genes that were functionally  
478 annotated, and interestingly, three out of four were predicted to function in carbon utilization  
479 (Suppl. Table 4G).

480

481 *Phyllosticta* species contain less genes in OGs encoding effectors with an average of  
482 74 genes compared to the overall average of 93 genes. In addition, *Phyllosticta* species  
483 contained on average 30 putative effector genes that were not in an OG or that were the only  
484 effector in an OG (singletons), which is lower than the average of 44 singleton effector genes  
485 for the other *Dothideomycetes*. Comparable to secreted proteins, when assessing the total  
486 number of predicted effector genes (both in OGs and singletons), *Phyllosticta* endophytes  
487 appear to have slightly more putative effector genes (average of 109) as compared to  
488 *Phyllosticta* pathogens (average of 106.5), but when taken as percentage of the total number  
489 of predicted proteomes per species, this difference is negligible (0.95% vs 0.94%) (Fig 3B–D,  
490 Suppl. Table 4D). A total of 30 effector OGs contained genes from all *Phyllosticta* species  
491 while also containing genes from other species. One of these had higher gene numbers in  
492 endophytes, but received no annotation, while none had higher gene numbers in pathogens.

493 Effector genes are often hypothesized to be species and/or strain specific (Lo Presti *et al.*  
494 2015; Sperschneider *et al.* 2015). We identified in total 67 OGs containing effectors that are  
495 unique to *Phyllosticta*, seven of which were present in all pathogens but not in endophytes,  
496 two were present in all endophytes but not in pathogens, and one had higher gene numbers  
497 in endophytes (Suppl. Table 4E). Genes of the seven pathogen-only OGs were not colocalized  
498 as described in some fungal phytopathogens (Ma *et al.* 2010; Dong *et al.* 2015) but rather are  
499 spread across separate scaffolds. None of these unique effector genes were functionally  
500 annotated, suggesting that these have yet undescribed functions.

501

502         The occurrence of *P. citrichinaensis* effector genes in lifestyle-associated OGs could  
503 provide further evidence for its lifestyle. One of the seven effector OGs that only occurred in  
504 pathogens contained a gene from one of the *P. citrichinaensis* strains. In contrast, both  
505 endophyte-only effector OGs contained genes from *P. citrichinaensis*, in one case only from  
506 one strain, and in the other case from both strains. In the effector OG that had more genes in  
507 endophytes, *P. citrichinaensis* followed an intermediate pattern: one strain contained the same  
508 number of genes as pathogens, while the other contained the same number as endophytes.  
509 These data thus suggest that *P. citrichinaensis* follows an intermediate lifestyle.

510

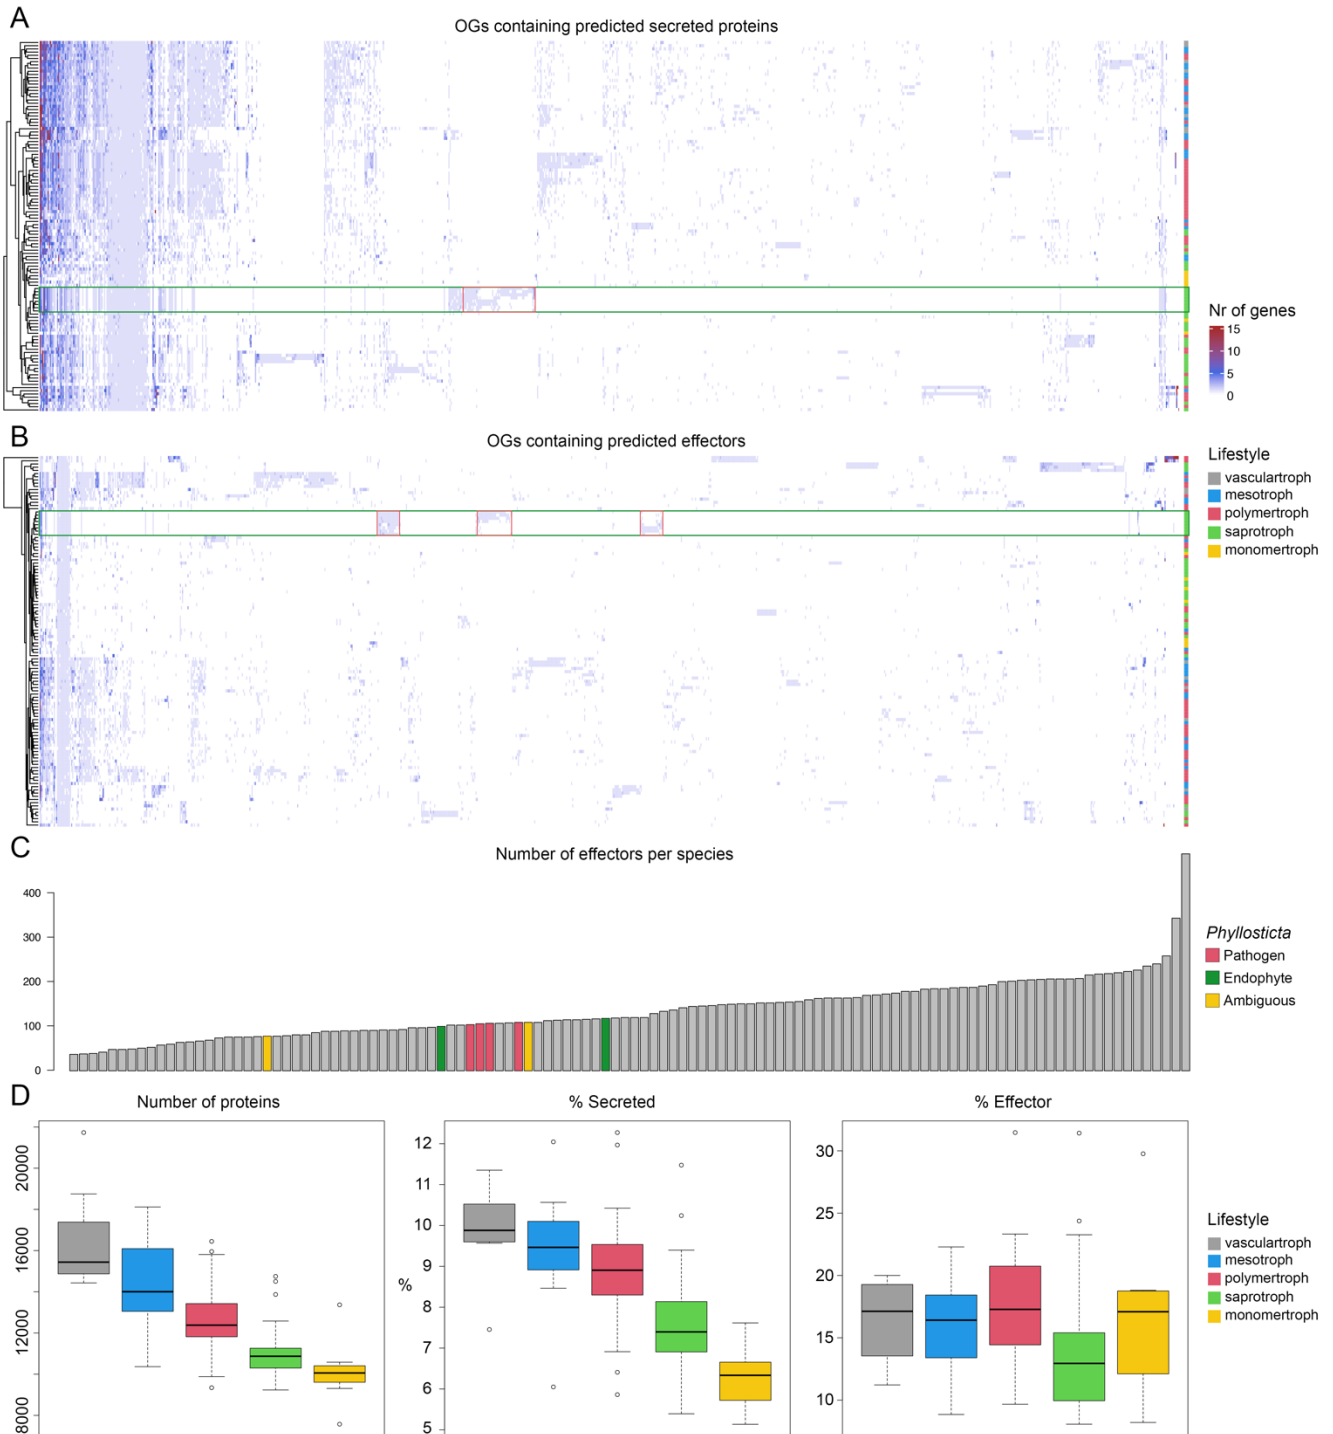

511

512 **Figure 3. Species cluster independent of their taxonomic relationship based on**  
513 **presence of secreted or effector proteins.** Clustered heatmaps of the number of genes in  
514 OGs that were predicted to contain **A.** secreted proteins and **B.** effectors. Lifestyles as  
515 predicted by CATAstrophy (Fig. 4). *Phyllosticta* species are highlighted with green rectangles,  
516 *Phyllosticta*-unique OGs are highlighted in red rectangles. **C.** Number of effectors per species  
517 (both those in OGs and singletons). *Phyllosticta* species are highlighted in red (pathogens),  
518 green (endophytes), and yellow (*P. citrichinaensis*). **D.** The total number of proteins, the  
519 percentage of proteins that is predicted to be secreted, and the percentage of secreted  
520 proteins that is predicted to be an effector, in species of different lifestyles (as predicted by  
521 CATAstrophy, Fig. 4).

522 **3.6 – *Phyllosticta citrichinaensis* clusters with pathogens based on carbon growth**

523 **data**

524 CAZymes enable fungi to utilize different carbon sources (van den Brink and de Vries 2011;  
525 Lombard *et al.* 2014), and are thought to be involved in fungal pathogenicity (ten Have *et al.*  
526 2002; King *et al.* 2011; Kubicek *et al.* 2014; Hane *et al.* 2020). We have previously shown that  
527 carbon utilization capabilities differ between *Phyllosticta* spp. and uncovered a clear distinction  
528 in the ability of pathogens and endophytes to grow in the presence of sugar beet pulp; while  
529 the growth of endophytes was unchanged, pathogens were strongly inhibited (Buijs *et al.*  
530 2021). To assess if *P. citrichinaensis* displays similar growth behavior to pathogens or  
531 endophytes, we grew *P. citrichinaensis* on 35 different carbon sources including sugar beet  
532 pulp (Fig. 4). Interestingly, growth of *P. citrichinaensis* is not inhibited by the presence of sugar  
533 beet pulp (Fig. 4A), suggesting that *P. citrichinaensis* behaves comparable to endophytic  
534 *Phyllosticta* spp. To further substantiate this observation, we performed hierarchical clustering  
535 of seven *Phyllosticta* strains based on their growth on all 35 carbon sources. Unanticipatedly,  
536 *P. citrichinaensis* clustered together with the pathogenic species rather than with the  
537 endophytes (Fig. 4B). Thus, although *P. citrichinaensis* is not inhibited by sugar beet pulp, it  
538 generally displays carbon utilization capabilities comparable with pathogens.

539

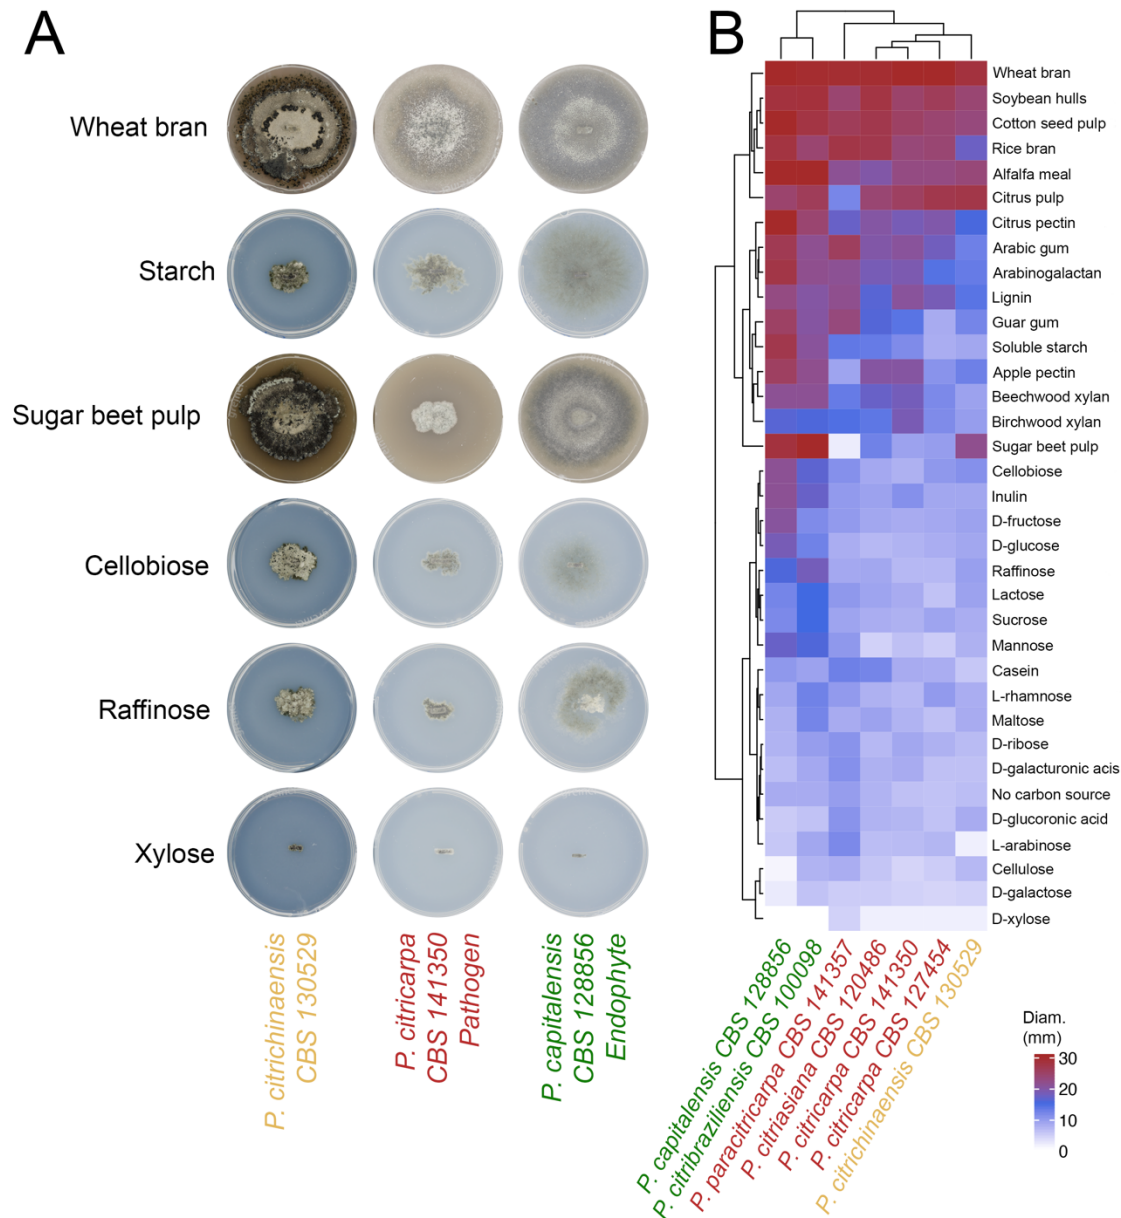

540

541 **Figure 4. *Phyllosticta citrichinaensis* clusters with pathogens based on growth on 35**  
 542 **carbon sources, but behaves like an endophyte in the presence of sugar beet pulp. A.**  
 543 **Images of *Phyllosticta* species growing on a selection of different carbon sources. B.**  
 544 **Clustering of *Phyllosticta* species based on their growth on different carbon sources. All**  
 545 **species were grown on 35 different carbon sources, colony diameters were measured, and**  
 546 **images takes on all sources when the biggest colony of a species reached the edge of its**  
 547 **plate. All species grew fastest on wheat bran.**

548 **3.7 – Genomes of *Dothideomycetes* can be clearly distinguished based on CAZyme**  
549 **content, but this does not correlate well with lifestyles described in literature**

550 The genetic basis for the ability to utilize different carbon sources is often caused by  
551 differences in CAZymes repertoires (van den Brink and de Vries 2011; Lombard *et al.* 2014).  
552 Interestingly, the abundance and diversity of CAZymes encoded in a genome is also related  
553 to lifestyle and consequently enables to predict the trophic classification of a species (Lo Presti  
554 *et al.* 2015; Hane *et al.* 2020). To determine the trophic classification for *P. citrichinaensis*, we  
555 used CATAstrophy to annotate CAZyme genes for all 116 predicted proteomes and to perform  
556 a principal component analysis (PCA) to distinguish species with different trophic classes  
557 based on their CAZyme repertoire. CATAstrophy clearly separated species of different trophic  
558 classes based on the first principal component (PC1) (Fig. 5A and Suppl. Table 5). The second  
559 principal component (PC2) mainly separated species based on phylogeny; as previously  
560 observed for fungi and oomycetes (Hane *et al.* 2020), oomycetes clustered together separated  
561 along the PC2 axis from fungi. The different trophic classes differ considerably in the numbers  
562 of genes per CAZyme family (Fig. 5B). For example, GH families differ clearly between trophic  
563 class, and GH are also the CAZyme families with the highest number of genes per species.  
564 In contrast, almost no difference can be observed in the PL family, which generally has the  
565 smallest number of genes per species. The CATAstrophy gene predictions were used to  
566 identify CAZyme-containing OGs, for which we then obtained the number of genes present in  
567 each species to generate a clustered heatmap (Fig. 5C). We observed three distinct clusters  
568 that differ in their CAZyme repertoires, which typically correlate well with the CATAstrophy  
569 trophic predictions (Fig. 5C and Suppl. Table 5). The CATAstrophy trophic predictions also  
570 correlate well with the numbers of secreted proteins and effectors, although we did not observe  
571 such a strict separation into three clusters as was observed for CAZyme genes (Fig. 5C, Fig.  
572 3).

573

574 All *Phyllosticta* species were predicted to be saprotrophs by CATAstrophy (Fig. 5C)  
575 and clustered according to their phylogenetic relationship, suggesting that they are generally



576 very similar in terms of CAZymes (Suppl. Table 5). Consequently, *P. citrichinaensis* clustered  
 577 most closely to *P. citribraziliensis*, an endophyte, as this is its closest relative (Fig. 1A). We  
 578 nevertheless found six CAZyme families that show consistent differences in gene number  
 579 between pathogens and endophytes: AA1\_3, AA3, CBM18, CBM67, GH3, and PL22 (Table  
 580 1). In all cases except AA3, *P. citrichinaensis* follows the endophytic pattern. Together, these  
 581 results indicate that in terms of the presence of CAZyme genes, the *P. citrichinaensis*  
 582 genomes compare best to those of endophytes.

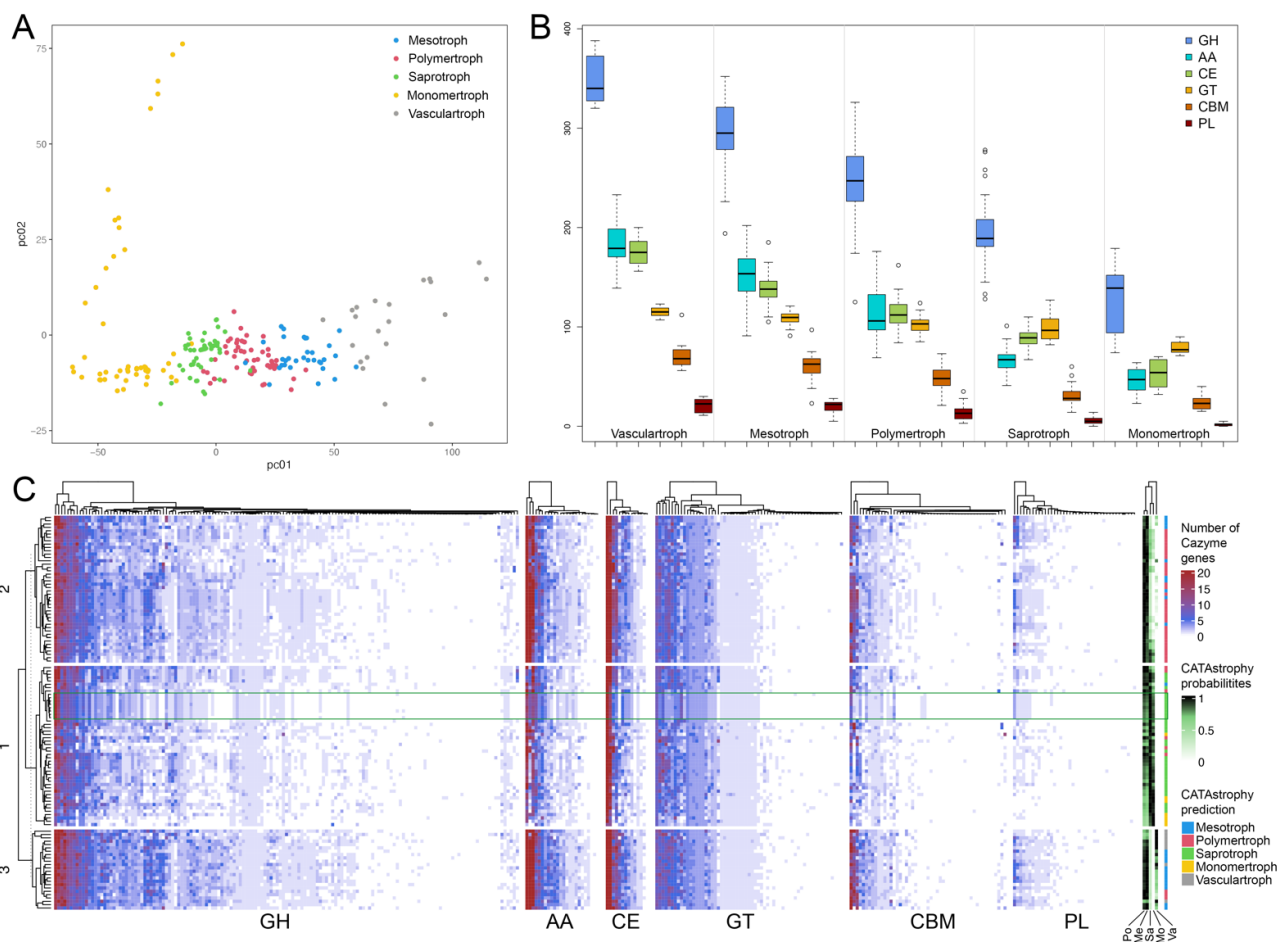

583

584 **Figure 5. Separation of species into different trophy classes based on presence of**  
 585 **CAZyme genes in their genomes. A.** PCA plot of PC1 vs PC2. PC1 separates species of  
 586 different trophy classes, PC2 separates species on phylogeny. **B.** Number of CAZyme genes  
 587 in each CAZy family per CATAstrophy class. **C.** Clustered heatmap of the number of CAZyme-  
 588 gene-containing OGs per species. GH = Glycosyl hydrolase, AA = Auxiliary activity, CE =  
 589 Carbohydrate esterase, GT = Glycosyl transferase, CBM = Carbohydrate binding module, PL  
 590 = Pectin lyase. Po = Polymertroph, Me = Mesotroph, Sa = Saprotroph, Mo = Monomertroph,  
 591 Va = Vasculartroph.

## 592 4 – Discussion

593 Lifestyle adaptations are thought to be driven by differences in gene content, and especially  
594 CAZymes are assumed to be crucial (ten Have *et al.* 2002; King *et al.* 2011; Hane *et al.* 2020).  
595 Here we aimed to elucidate the genomic differences between endophytes and pathogens  
596 within the *Phyllosticta* genus occurring on citrus, and aimed to determine the lifestyle of *P.*  
597 *citrichinaensis*. Based on the results we uncovered several differences between species with  
598 different lifestyles. For instance, endophytes more frequently contain higher numbers of genes  
599 in OGs, and these genes are more often annotated than in pathogenic species. In addition,  
600 pathogenic species share more un-annotated lifestyle-specific OGs as compared to  
601 endophytic species. Furthermore, we show that species cluster independently of phylogeny  
602 based on the CAZyme content of their genomes, and this clustering correlated well with trophic  
603 prediction by CATAstrophy. The ambiguous species *P. citrichinaensis* showed characteristics  
604 that matched with endophytes in some cases, with pathogens in other cases, and sometimes  
605 it did not match with either lifestyle, suggesting it may exhibit an intermediate lifestyle not  
606 accounted for in the current definitions.

607

608 We previously observed that only four CAZyme families showed a consistent  
609 difference between endophytic and pathogenic species (Buijs *et al.* 2021), one of which  
610 contained AA1\_3/CBM18 (seven in pathogens vs eight in endophytes), which were mixed in  
611 one orthologue group, and another one contained family CBM18 only. In this study, we found  
612 in total six CAZyme families with a consistent difference between endophytes and pathogens.  
613 These included two separate OGs that contained the AA1\_3 and CBM18 CAZyme families,  
614 which both consistently contained more genes in endophytes compared to pathogens.  
615 CATAstrophy predicts on average about 90 CAZyme genes extra compared to our previous  
616 results (Buijs *et al.* 2021). The biggest difference can be found in the CE (carbohydrate  
617 esterase) family, where between 83–89 genes are predicted instead of 15–17. Most of these  
618 are in the CE10 family (47–53). The CE10 family is no longer listed as carbohydrate active  
619 enzyme by the *cazy.org* database (used by JGI) because most of the members of this family

620 act on non-carbohydrate substances (Lombard *et al.* 2014). If we manually remove these,  
621 CATAstrophy still predicts 20 extra genes in the CE family. In addition, there are some 15–20  
622 extra genes predicted in the AA family, five to ten more in the GH family, and approximately  
623 five more in the GT family. Numbers in the PL family are practically identical. In the CBM  
624 family, CATAstrophy predicts about five to ten genes less. In the JGI annotation pipeline, many  
625 of the genes in the CBM family contained multiple domains and were therefore counted  
626 multiple times, which might have led to an overestimation. However, for most families it seems  
627 that CATAstrophy predicts more genes compared to JGI. As most of the CAZyme genes  
628 predicted by JGI are based on some experimental validation (cazy.org), it would be wise to  
629 experimentally validate the CAZyme genes that were predicted by CATAstrophy and not by  
630 JGI.

631

632 Genes related to secondary metabolite biosynthesis but not the number of biosynthetic  
633 gene clusters (BGCs) as predicted by antiSMASH differ between species. It is important to  
634 note here that BGC prediction by antiSMASH is based primarily on the presence of a gene to  
635 produce the metabolite 'backbone', such as a polyketide synthase (PKS) (Blin *et al.* 2019).  
636 Once such a gene is found, antiSMASH takes an area in the genome of up to 20 kb (depending  
637 on the type of backbone gene) on either side of the gene and checks for the presence of  
638 tailoring genes, which are then all automatically included in the BGC. This means that tailoring  
639 genes that are altered or inactive are still included in the predicted BGC, and that alterations  
640 in genes may not result in an altered BGC prediction. In contrast, although the cluster may  
641 look very similar, alterations in tailoring genes may lead to the production of a very different  
642 compound: a good example is the synthesis of the toxins dothistromin, aflatoxin, and  
643 sterigmatocystin, which are all synthesized in a very similar manner, with only the very last  
644 tailoring steps being different (Schwelm and Bradshaw, 2010; for a review see Hüttel and  
645 Müller, 2021). We therefore conclude that although antiSMASH did not detect differences in  
646 BGC numbers, alterations in biosynthetic genes may be responsible for the differences

647 between species of different lifestyles in the genus *Phyllosticta*, and this will be an interesting  
648 subject for future studies.

649

650 CATAstrophy was able to clearly separate species based on the number of CAZyme  
651 genes present in the genomes and was able to separate species into different trophic  
652 predictions. Apart from closely related species that cluster together, a phylogenetic pattern  
653 cannot be observed in the clustering of the heatmap or in the trophic predictions, which  
654 suggests that there is a strong signal that links genome content to lifestyle. CATAstrophy also  
655 allows for trophic-overlap for species that are bordering two trophic classes, such as for *Sclerotinia*  
656 *sclerotiorum*, which received very high scores for both the polymertroph and the saprotroph  
657 class (Suppl. Fig. 5). This is consistent with literature, as *S. sclerotiorum* has been described  
658 to exhibit a necrotrophic phase that is followed by a saprotrophic phase (Hegedus and Rimmer  
659 2005). *Sclerotinia sclerotiorum* is a much-researched model organism, and the descriptions in  
660 literature of its lifestyle are therefore well-developed. However, for many fungal species, this  
661 is not the case, and circumscriptions in literature are often limited or conflicting. Indeed, we  
662 see that the trophic predictions by CATAstrophy do not always correlate well with lifestyles  
663 described (or supposed) in literature: each trophic class includes species that are described  
664 as pathogens, endophytes, symbionts, or saprotrophs, or which have been described to  
665 exhibit multiple of these lifestyles. An underlying cause for this fact is that lifestyles that are  
666 described in literature may be inaccurate as the border between species of different lifestyles  
667 such as necrotrophs, hemibiotrophs, or biotrophs is not very strict, or need very specific  
668 conditions to manifest. For instance, *Phytophthora infestans* has been placed in all three  
669 classes (Oliver and Ipcho 2004). Similarly, *Botrytis cinerea* has been placed in different  
670 classes as the symptoms it causes differ widely in their severity, depending on the exact  
671 interaction with the host (Veloso and Van Kan 2018). Within the genus *Phyllosticta*, some  
672 obscurity with respect to lifestyle is present for instance for *P. capitalensis*, which is a  
673 widespread endophyte of many hosts including citrus (Wikee *et al.* 2013a), but may cause  
674 disease in other hosts such as guava (Arafat 2018). In addition, non-pathogens can evolve a

675 pathogenic lifestyle, and vice-versa, as can be observed with pathogenicity on pea  
676 by *Neocosmospora solani*, which is dependent on the presence of only a few genes, or with  
677 pathogenicity of *Fusarium oxysporum* on cucurbit species, which is determined by the  
678 absence or presence of a mobile pathogenicity chromosome (Temporini and Vanetten 2002;  
679 Dong *et al.* 2015; van Dam *et al.* 2017; Möller and Stukenbrock 2017). The possibility for  
680 species to be categorized into multiple trophies in the CAZyme-based classification system  
681 therefore presents an advantage over the traditional classification system as it allows for a  
682 more correct, double classification of species that exhibit multiple lifestyles depending on the  
683 host and other environmental parameters.

684

685         We compared genomes of species with different lifestyles within the genus *Phyllosticta*  
686 specifically, and found several distinctions. We observed that endophytes more often have  
687 higher numbers of genes in specific OGs as compared to pathogens. This suggests that the  
688 ability to be an endophyte necessitates the presence of additional genes. The ancestral  
689 *Dothideomycete* was likely a saprotroph, however, the most common ancestor of the  
690 *Botryosphaerales*, the order in which *Phyllosticta* resides, was probably a plant pathogen, as  
691 determined by ancestral state reconstruction (Abdollahzadeh *et al.* 2020; Haridas *et al.* 2020).  
692 The evolution of *Phyllosticta* endophytes from *Phyllosticta* pathogens through a gain of genes  
693 and thereby gain of abilities is therefore a plausible scenario. With respect to lifestyle definition  
694 in *Phyllosticta*, *P. citrichinaensis* is the most ambiguous citrus-related species within the  
695 genus. By comparing the genome of this species with those of other species with different  
696 lifestyles within the genus *Phyllosticta*, we aimed to elucidate the lifestyle of this species. In  
697 several aspects, we found *P. citrichinaensis* to be most similar to endophytes. For instance,  
698 *P. citrichinaensis* shares more OGs specific to species of one lifestyle with endophytic species  
699 (50) than it does with pathogenic species (30), and none of its biosynthetic gene clusters was  
700 predicted to produce a squalestatin, which was also the case for all of the endophytes, but not  
701 for the pathogens. In addition, CAZyme families that had more genes in endophytes than in  
702 pathogens, often also had more genes in *P. citrichinaensis*. Furthermore, growth of *P.*

703 *citrichinaensis* was not inhibited by the presence of sugar beet pulp, similarly to endophytic  
704 species. In contrast, its broader carbon utilization capabilities were more comparable to those  
705 of pathogenic species. Another aspect in which *P. citrichinaensis* was comparable to  
706 pathogens, was the presence of more putative peroxiredoxin genes in pathogens and *P.*  
707 *citrichinaensis* as compared to endophytes. On other aspects, *P. citrichinaensis* did not  
708 compare well with species of either lifestyle, such as the number of OGs that had more genes  
709 in species of either lifestyle: in almost a third of the cases, *P. citrichinaensis* did not match the  
710 gene numbers of either lifestyle. The number of effector genes that *P. citrichinaensis* shared  
711 with species of either lifestyle also suggests an intermediate pattern. The lifestyle of *P.*  
712 *citrichinaensis* cannot be univocally determined without performing pathogenicity assays, but  
713 as these are currently not available for this species, the data presented here give a good  
714 estimation that shows that *P. citrichinaensis* is an intermediate taxon, not perfectly fitting into  
715 any of the currently defined lifestyle definitions.

716

717         Research performed in recent years has shown with increasing confidence that  
718 borders between lifestyles simply are not very strict and in fact are subject to constant change.  
719 Examples such as *B. cinerea* and *Phytophthora infestans*, which both have been placed in  
720 multiple lifestyle classes depending on the host and other environmental parameters,  
721 demonstrate that our current classification systems are not always adequate to separate  
722 species into different lifestyles (Oliver and Ipcho 2004; Veloso and Van Kan 2018). In addition,  
723 the ability of species to be pathogenic to a specific host may change with the gain of only a  
724 few genes (Temporini and Vanetten 2002; van Dam *et al.* 2017). Classifying plant-associated  
725 microbes into different lifestyles is an important area of research as it allows for the  
726 identification of genomic parameters that are required for pathogenicity, and therefore aids in  
727 the search of a remedy against such pathogens. However, a classification system is only  
728 valuable if it allows for the accurate separation of species; an incorrectly classified organism  
729 may lead to incorrect conclusions and could cause much confusion. A classification such as  
730 the one proposed by Hane *et al.*, which is based on the number of CAZyme genes in a species'

731 genome, is a significant improvement since it allows for overlap between lifestyles. Further  
732 development of such classifications for instance by the addition of other genomic parameters  
733 such as the presence of effectors could lead to the development of a more accurate and useful  
734 classification system in the future.

735

#### 736 **Data availability statement**

737 The whole genome sequencing data including annotations for the newly sequenced  
738 *Phyllosticta citrichinaensis* genome are publicly available at the JGI genome portal:  
739 <https://mycocosm.jgi.doe.gov/Pcit129764>. The authors affirm that all other data necessary for  
740 confirming the conclusions of the article are present within the article, figures, and  
741 (supplementary) tables.

742

#### 743 **Acknowledgements**

744 This work was funded by the Dutch Applied Science division (TTW) of NWO and the  
745 Technology Program of the Ministry of Infrastructure and Water Management under project  
746 15807 of the Research Programme I&W Biotechnology and Safety. The work conducted by  
747 the U.S. Department of Energy Joint Genome Institute, a DOE Office of Science User Facility,  
748 is supported by the Office of Science of the U.S. Department of Energy under Contract No.  
749 DE-AC02-05CH11231.

750

751 **Tables**

752

753 **Table 1. CAZyme families with gene abundance differences between endophytes and**  
 754 **pathogens. Columns with a darker fill color indicate the family which is more abundant**  
 755 **in pathogens, while the lighter color indicates those which are more abundant in**  
 756 **endophytes.**

| Species name                                | Lifestyle | CBM67 | AA1_3 | CBM18 | GH3 | PL22 | AA3 |
|---------------------------------------------|-----------|-------|-------|-------|-----|------|-----|
| <i>Phyllosticta capitalensis</i>            | E         | 0     | 10    | 10    | 15  | 1    | 2   |
| <i>Phyllosticta citribraziliensis</i>       | E         | 0     | 10    | 9     | 15  | 1    | 2   |
| <i>Phyllosticta citrichinaensis</i>         | ?         | 0     | 10    | 9     | 16  | 1    | 1   |
| <i>Phyllosticta citrichinaensis</i>         | ?         | 0     | 10    | 9     | 15  | 1    | 1   |
| <i>Phyllosticta citriasiana</i>             | P         | 1     | 9     | 7     | 13  | 0    | 1   |
| <i>Phyllosticta citricarpa</i> (CPC 27913)  | P         | 1     | 9     | 6     | 14  | 0    | 1   |
| <i>Phyllosticta citricarpa</i> (CBS 127454) | P         | 1     | 9     | 7     | 14  | 0    | 1   |
| <i>Phyllosticta paracitricarpa</i>          | P         | 1     | 9     | 7     | 14  | 0    | 1   |

757



758 **Supplementary Figures**

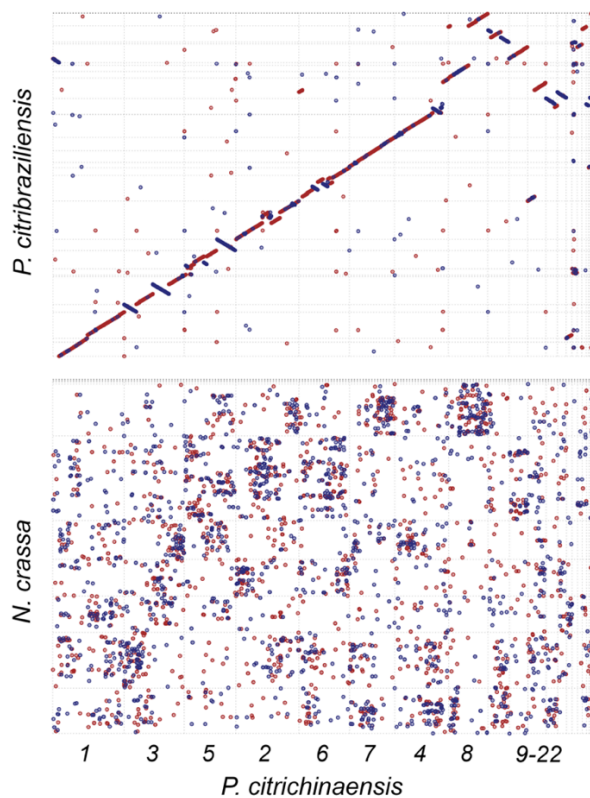

759

760 **Supplementary Fig. S1.** Whole-genome alignments between *P. citrichinaensis* and *P.*  
761 *citribraziliensis* (top panel) and *Neurospora crassa* (lower panel) were generated using  
762 PROmer. The red line/dot = homologous area and the blue line/dot = reversed homologous  
763 area.

764

765

766 **Supplementary Tables (submitted as separate excel files)**

767

768 **Supplementary Table 1. Genome data**, including QUAST and BUSCO results, of all species  
769 used in this study.

770

771 **Supplementary Table 2. Orthofinder results.** **A.** Orthofinder statistical data. **B.** List of  
772 ortholog groups (OGs) that are unique in species of one lifestyle. **C.** List of OGs that have  
773 more genes in species of one lifestyle.

774

775 **Supplementary Table 3. Annotation data of OGs. A.** Annotation data of OGs present only  
776 in endophytes. **B.** Annotation data of OGs present in endophytes and *P. citrichinaensis* (PCC).  
777 **C.** Annotation data of OGs present only in pathogens. **D.** Annotation data of OGs present in  
778 pathogens and *P. citrichinaensis* (PCC). **E.** Annotation data of OGs that consistently contain  
779 more genes in *Phyllosticta* endophytes as compared to *Phyllosticta* pathogens. **F.** Annotation  
780 data of OGs that consistently contain more genes in *Phyllosticta* pathogens as compared to  
781 *Phyllosticta* endophytes. **G.** Annotation data of OGs in which the gene number in *P.*  
782 *citrichinaensis* (PCC) matches the number of endophytes. **H.** Annotation data of OGs in which  
783 the gene number in *P. citrichinaensis* (PCC) matches the number of pathogens. **I.** The number  
784 of OGs in each lifestyle-related group that is classified to each KOG class. **J.** A list of  
785 annotation files from the JGI database that were included in these analyses.

786

787 **Supplementary Table 4. Data of OGs that contain putative secreted and effector**  
788 **proteins. A.** Secreted OGs in listed in order corresponding to Figure 3A. **B.** Effector OGs  
789 listed in order corresponding to Figure 3B. **C.** Number of secreted genes as estimated by:  
790 number of genes in secreted OG vs signalP prediction. **D.** Number of effector genes as  
791 estimated by number of genes in effector OG vs effectorP prediction. **E.** Effector OGs that are  
792 unique to species of *Phyllosticta*. **F.** Effector OGs that are present in all *Phyllosticta* spp. **G.**  
793 Functions of secreted OGs that are unique to *Phyllosticta*.

794

795 **Supplementary Table 5. CATAstrophy results.** Including all trophy predictions and all  
796 CAZyme gene counts.

797 **References**

- 798 Abdollahzadeh, J., J. Z. Groenewald, M. P. A. Coetzee, M. J. Wingfield, and P. W. Crous,  
799 2020 Evolution of lifestyles in Capnodiales. *Stud. Mycol.* 95: 381–414.
- 800 Almagro Armenteros, J. J., K. D. Tsirigos, C. K. Sønderby, T. N. Petersen, O. Winther *et al.*,  
801 2019 SignalP 5.0 improves signal peptide predictions using deep neural networks. *Nat.*  
802 *Biotechnol.* 2019 374 37: 420–423.
- 803 Arafat, K., 2018 A novel isolate of *Phyllosticta capitalensis* causes Black Spot Disease on  
804 Guava fruit in Egypt. *Asian J. Plant Pathol.* 12: 27–37.
- 805 Blin, K., S. Shaw, K. Steinke, R. Villebro, N. Ziemert *et al.*, 2019 antiSMASH 5.0: updates to  
806 the secondary metabolite genome mining pipeline. *Nucleic Acids Res.* 47: W81–W87.
- 807 van den Brink, J., and R. P. de Vries, 2011 Fungal enzyme sets for plant polysaccharide  
808 degradation. *Appl. Microbiol. Biotechnol.* 91: 1477–1492.
- 809 Buijs, V. A., X. C. L. Zuijdgeest, J. Z. Groenewald, P. W. Crous, and R. P. de Vries, 2021  
810 Carbon utilization and growth-inhibition of citrus-colonizing *Phyllosticta* species. *Fungal*  
811 *Biol.* 125: 815–825.
- 812 Chiapello, H., L. Mallet, C. Gué Rin, G. Aguilera, J. Lle Amselem *et al.*, 2015 Deciphering  
813 genome content and evolutionary relationships of isolates from the fungus  
814 *Magnaporthe oryzae* attacking different host plants. *Genome Biol. Evol.* 7: 2896–2912.
- 815 Conway, J. R., A. Lex, and N. Gehlenborg, 2017 UpSetR: an R package for the visualization  
816 of intersecting sets and their properties. *Bioinformatics* 33: 2938–2940.
- 817 van Dam, P., L. Fokkens, Y. Ayukawa, M. van der Gragt, A. ter Horst *et al.*, 2017 A mobile  
818 pathogenicity chromosome in *Fusarium oxysporum* for infection of multiple cucurbit  
819 species. *Sci. Rep.* 7: 9042.
- 820 van Dam, P., and M. Rep, 2017 The distribution of Miniature Impala Elements and SIX  
821 genes in the *Fusarium* genus is suggestive of horizontal gene transfer. *J. Mol. Evol.* 85:  
822 14–25.
- 823 Dong, S., S. Raffaele, and S. Kamoun, 2015 The two-speed genomes of filamentous  
824 pathogens: waltz with plants. *Curr. Opin. Genet. Dev.* 35: 57–65.

- 825 Emms, D. M., and S. Kelly, 2019 OrthoFinder: Phylogenetic orthology inference for  
826 comparative genomics. *Genome Biol.* 20: 238.
- 827 European Food Safety Authority, 2014 Scientific Opinion on the risk of *Phyllosticta citricarpa*  
828 (*Guignardia citricarpa*) for the EU territory with identification and evaluation of risk  
829 reduction options: Wiley-Blackwell Publishing Ltd.
- 830 Eustáquio Lanza, F., T. Germano Metzker, T. Vinhas, F. Behlau, and G. José Silva Junior,  
831 2018 Critical fungicide spray period for Citrus Black Spot control in São Paulo State,  
832 Brazil. *Plant Dis.* 102: 334–340.
- 833 Fisher, M. C., D. A. Henk, C. J. Briggs, J. S. Brownstein, L. C. Madoff *et al.*, 2012 Emerging  
834 fungal threats to animal, plant and ecosystem health. *Nature* 484: 186–194.
- 835 Fouché, S., C. Mence Plissonneau, and D. Croll, 2018 The birth and death of effectors in  
836 rapidly evolving filamentous pathogen genomes. *Curr. Opin. Microbiol.* 46: 34–42.
- 837 Fudal, I., S. Ross, H. Brun, A.-L. Besnard, M. Ermel *et al.*, 2009 Repeat-Induced Point  
838 Mutation (RIP) as an alternative mechanism of evolution toward virulence in  
839 *Leptosphaeria maculans*. *Mol. Plant-Microbe Interact.* 22: 932–941.
- 840 Gardiner, D. M., M. C. McDonald, L. Covarelli, P. S. Solomon, A. G. Rusu *et al.*, 2012  
841 Comparative pathogenomics reveals horizontally acquired novel virulence genes in  
842 fungi infecting cereal hosts (A. P. Mitchell, Ed.). *PLoS Pathog.* 8: e1002952.
- 843 Gibriel, H. A. Y., B. P. H. J. Thomma, and M. F. Seidl, 2016 The age of effectors: genome-  
844 based discovery and applications. *Phytopathology* 106: 1206–1212.
- 845 Glienke, C., O. L. Pereira, D. Stringari, J. Fabris, V. Kava-Cordeiro *et al.*, 2011 Endophytic  
846 and pathogenic *Phyllosticta* species, with reference to those associated with Citrus  
847 Black Spot. *Persoonia* 26: 47–56.
- 848 Grigoriev, I. V., R. Nikitin, S. Haridas, A. Kuo, R. Ohm *et al.*, 2014 MycoCosm portal: gearing  
849 up for 1000 fungal genomes. *Nucleic Acids Res.* 42: D699–D704.
- 850 Gu, Z., R. Eils, and M. Schlesner, 2016 Complex heatmaps reveal patterns and correlations  
851 in multidimensional genomic data. *Bioinformatics* 32: 2847–2849.
- 852 Guarnaccia, V., T. Gehrman, G. J. Silva-Junior, P. H. Fourie, S. Haridas *et al.*, 2019

- 853 Phyllosticta citricarpa and sister species of global importance to Citrus. Mol. Plant  
854 Pathol. 20: 1619–1635.
- 855 Guarnaccia, V., J. Z. Groenewald, H. Li, C. Glienke, E. Carstens *et al.*, 2017 First report of  
856 Phyllosticta citricarpa and description of two new species, P. paracapitalensis and P.  
857 paracitricarpa, from citrus in Europe. Stud. Mycol. 87: 161–185.
- 858 Gurevich, A., V. Saveliev, N. Vyahhi, and G. Tesler, 2013 QUASt: quality assessment tool  
859 for genome assemblies. Bioinformatics 29: 1072–1075.
- 860 Hane, J. K., J. Paxman, D. A. B. Jones, R. P. Oliver, and P. de Wit, 2020 “CATASrophy,” a  
861 genome-informed trophic classification of filamentous plant pathogens – how many  
862 different types of filamentous plant pathogens are there? Front. Microbiol. 10: 3088.
- 863 Hane, J. K., T. Rouxel, B. J. Howlett, G. H. Kema, S. B. Goodwin *et al.*, 2011 A novel mode  
864 of chromosomal evolution peculiar to filamentous Ascomycete fungi. Genome Biol. 12:  
865 1–16.
- 866 Haridas, S., R. Albert, M. Binder, J. Bloem, K. LaButti *et al.*, 2020 101 Dothideomycetes  
867 genomes: a test case for predicting lifestyles and emergence of pathogens. Stud.  
868 Mycol. 96: 141–153.
- 869 ten Have, A., K. B. Tenberge, J. A. E. Benen, P. Tudzynski, J. Visser *et al.*, 2002 The  
870 contribution of cell wall degrading enzymes to pathogenesis of fungal plant pathogens,  
871 pp. 341–358 in *The Mycota XI: Agricultural Applications*, Springer Berlin Heidelberg,  
872 Berlin, Heidelberg.
- 873 Hegedus, D. D., and S. R. Rimmer, 2005 Sclerotinia sclerotiorum: When “to be or not to be”  
874 a pathogen? FEMS Microbiol. Lett. 251: 177–184.
- 875 Hüttel, W., and M. Müller, 2021 Regio- and stereoselective intermolecular phenol coupling  
876 enzymes in secondary metabolite biosynthesis. Nat. Prod. Rep. 38: 1011–1043.
- 877 Kabbage, M., O. Yarden, and M. B. Dickman, 2015 Pathogenic attributes of Sclerotinia  
878 sclerotiorum: switching from a biotrophic to necrotrophic lifestyle. Plant Sci. 233: 53–60.
- 879 Kim, K.-T., J. Jeon, J. Choi, K. Cheong, H. Song *et al.*, 2016 Kingdom-wide analysis of  
880 fungal Small Secreted Proteins (SSPs) reveals their potential role in host association.

- 881 Front. Plant Sci. 7: 186.
- 882 King, B. C., K. D. Waxman, N. V Nenni, L. P. Walker, G. C. Bergstrom *et al.*, 2011 Arsenal of  
883 plant cell wall degrading enzymes reflects host preference among plant pathogenic  
884 fungi. *Biotechnol. Biofuels* 4: 1–14.
- 885 Klosterman, S. J., K. V. Subbarao, S. Kang, P. Veronese, S. E. Gold *et al.*, 2011  
886 Comparative genomics yields insights into niche adaptation of plant vascular wilt  
887 pathogens (J. L. Dangl, Ed.). *PLoS Pathog.* 7: e1002137.
- 888 Kotzé, J. M., 2000 Black spot, pp. 23–25 in *Compendium of Citrus Diseases*. American  
889 *Phytopathological Society Press Inc. Timmer, L.W., Garnsey, S.M. and Graham, J.H.*,  
890 The American Phytopathological Society.
- 891 Kubicek, C. P., T. L. Starr, and N. L. Glass, 2014 Plant cell wall–degrading enzymes and  
892 their secretion in plant-pathogenic fungi. *Annu. Rev. Phytopathol.* 52: 427–51.
- 893 Kubicek, C. P., A. S. Steindorff, K. Chenthamara, G. Manganiello, B. Henrissat *et al.*, 2019  
894 Evolution and comparative genomics of the most common *Trichoderma* species. *BMC*  
895 *Genomics* 20: 1–24.
- 896 Lindo, L., R. E. Cardoza, A. Lorenzana, P. A. Casquero, and S. Gutiérrez, 2020  
897 Identification of plant genes putatively involved in the perception of fungal ergosterol-  
898 squalene. *J. Integr. Plant Biol.* 62: 927–947.
- 899 Lombard, V., H. Golaconda Ramulu, E. Drula, P. M. Coutinho, and B. Henrissat, 2014 The  
900 carbohydrate-active enzymes database (CAZy) in 2013. *Nucleic Acids Res.* 42: D490–  
901 D495.
- 902 Ma, L.-J., H. C. van der Does, K. A. Borkovich, J. J. Coleman, M.-J. Daboussi *et al.*, 2010  
903 Comparative genomics reveals mobile pathogenicity chromosomes in *Fusarium*. *Nature*  
904 464: 367–73.
- 905 Manni, M., M. R. Berkeley, M. Seppey, F. A. Simão, and E. M. Zdobnov, 2021 BUSCO  
906 update: novel and streamlined workflows along with broader and deeper phylogenetic  
907 coverage for scoring of eukaryotic, prokaryotic, and viral genomes. *Mol. Biol. Evol.* 38:  
908 4647–4654.

- 909 Marçais, G., A. L. Delcher, A. M. Phillippy, R. Coston, S. L. Salzberg *et al.*, 2018 MUMmer4:  
910 A fast and versatile genome alignment system. *PLOS Comput. Biol.* 14: e1005944.
- 911 Mir, A. A., S.-Y. Park, M. A. Sadat, S. Kim, J. Choi *et al.*, 2015 Systematic characterization  
912 of the peroxidase gene family provides new insights into fungal pathogenicity in  
913 *Magnaporthe oryzae*. *Sci. Rep.* 5: 1–14.
- 914 Möller, M., and E. H. Stukenbrock, 2017 Evolution and genome architecture in fungal plant  
915 pathogens. *Nat. Rev. Microbiol.* 15: 756–771.
- 916 O'connell, R. J., M. R. Thon, S. Hacquard, S. G. Amyotte, J. Kleemann *et al.*, 2012 Lifestyle  
917 transitions in plant pathogenic *Colletotrichum* fungi deciphered by genome and  
918 transcriptome analyses. *Nat. Genet.* 44:.
- 919 Ohm, R. A., N. Feau, B. Henrissat, C. L. Schoch, B. A. Horwitz *et al.*, 2012 Diverse lifestyles  
920 and strategies of plant pathogenesis encoded in the genomes of eighteen  
921 dothideomycetes fungi (A. Andrianopoulos, Ed.). *PLoS Pathog.* 8: e1003037.
- 922 Oliver, R. P., and S. V. S. Ipcho, 2004 *Arabidopsis* pathology breathes new life into the  
923 necrotrophs-vs.-biotrophs classification of fungal pathogens. *Mol. Plant Pathol.* 5: 347–  
924 352.
- 925 Petters-Vandresen, D. A. L., B. J. Rossi, J. Z. Groenewald, P. W. Crous, M. A. Machado *et*  
926 *al.*, 2020 Mating-type locus rearrangements and shifts in thallism states in Citrus-  
927 associated *Phyllosticta* species. *Fungal Genet. Biol.* 144: 103444.
- 928 Plissonneau, C., J. Benevenuto, N. Mohd-Assaad, S. Fouché, F. E. Hartmann *et al.*, 2017  
929 Using population and comparative genomics to understand the genetic basis of  
930 effector-driven fungal pathogen evolution. *Front. Plant Sci.* 8: 119.
- 931 Lo Presti, L., D. Lanver, G. Schweizer, S. Tanaka, L. Liang *et al.*, 2015 Fungal effectors and  
932 plant susceptibility. *Annu. Rev. Plant Biol.* 66: 513–545.
- 933 R Core Team (2021). R: A language and environment for statistical computing. R  
934 Foundation for Statistical Computing, Vienna, Austria. URL <https://www.R-project.org/>.
- 935 Rocha, M. C., K. F. de Godoy, R. Bannitz-Fernandes, J. H. T. M. Fabri, M. M. F. Barbosa *et*  
936 *al.*, 2018 Analyses of the three 1-Cys Peroxiredoxins from *Aspergillus fumigatus* reveal

- 937 that cytosolic Prx1 is central to H<sub>2</sub>O<sub>2</sub> metabolism and virulence. *Sci. Reports* 2018 8: 1–18.
- 938
- 939 Rodrigues, C. M., M. A. Takita, N. V. Silva, M. Ribeiro-Alves, and M. A. Machado, 2019
- 940 Comparative genome analysis of *Phyllosticta citricarpa* and *Phyllosticta capitalensis*,
- 941 two fungi species that share the same host. *BMC Genomics* 20: 554.
- 942 Rovenich, H., J. C. Boshoven, and B. P. H. J. Thomma, 2014 Filamentous pathogen effector
- 943 functions: of pathogens, hosts and microbiomes. *Curr. Opin. Plant Biol.* 20: 96–103.
- 944 Schwelm, A., and R. E. Bradshaw, 2010 Genetics of Dothistromin biosynthesis of
- 945 *Dothistroma septosporum*: an update. *Toxins (Basel)*. 2: 2680–2698.
- 946 Shin, J., D. Bui, Y. Lee, H. Nam, S. Jung *et al.*, 2017 Functional characterization of
- 947 cytochrome P450 monooxygenases in the cereal head blight fungus *Fusarium*
- 948 *graminearum*. *Environ. Microbiol.* 19: 2053–2067.
- 949 Siewers, V., M. Viaud, D. Jimenez-Teja, I. Collado, C. Gronover *et al.*, 2005 Functional
- 950 analysis of the cytochrome P450 monooxygenase gene *bcbot1* of *Botrytis cinerea*
- 951 indicates that botrydial is a strain-specific virulence factor. *Mol. Plant. Microbe. Interact.*
- 952 18: 602–612.
- 953 Singh, R. P., D. P. Hodson, J. Huerta-Espino, Y. Jin, S. Bhavani *et al.*, 2011 The emergence
- 954 of Ug99 races of the stem rust fungus is a threat to world wheat production. *Annu. Rev.*
- 955 *Phytopathol.* 49: 465–481.
- 956 Spanu, P. D., 2012 The genomics of obligate (and nonobligate) biotrophs. *Annu. Rev.*
- 957 *Phytopathol.* 50: 91–109.
- 958 Sperschneider, J., P. N. Dodds, D. M. Gardiner, J. M. Manners, K. B. Singh *et al.*, 2015
- 959 Advances and challenges in computational prediction of effectors from plant pathogenic
- 960 fungi. *PLoS Pathog.* 11: e1004806.
- 961 Sperschneider, J., D. M. Gardiner, P. N. Dodds, F. Tini, L. Covarelli *et al.*, 2016 EffectorP:
- 962 predicting fungal effector proteins from secretomes using machine learning. *New*
- 963 *Phytol.* 210: 743–761.
- 964 Stergiopoulos, I., Y. A. I. Kourmpetis, J. C. Slot, F. T. Bakker, P. J. G. M. De Wit *et al.*, 2012



- 965 In silico characterization and molecular evolutionary analysis of a novel superfamily of  
966 fungal effector proteins. *Mol. Biol. Evol.* 29: 3371–3384.
- 967 Temporini, E. D., and H. D. Vanetten, 2002 Distribution of the pea pathogenicity (PEP )  
968 genes in the fungus *Nectria haematococca* mating population VI. *Curr. Genet.* 41: 107–  
969 114.
- 970 Veloso, J., and J. A. L. Van Kan, 2018 Many shades of grey in *Botrytis*-host plant  
971 interactions. *Trends Plant Sci.* 23: 613–622.
- 972 Wang, X., G. Chen, F. Huang, J. Zhang, K. D. Hyde *et al.*, 2012 *Phyllosticta* species  
973 associated with citrus diseases in China. *Fungal Divers.* 52: 209–224.
- 974 Wang, M., B. Liu, R. Ruan, Y. Zeng, J. Luo *et al.*, 2020 Genomic sequencing of *Phyllosticta*  
975 *citriasiana* provides insight into its conservation and diversification with two closely  
976 related *Phyllosticta* species associated with Citrus. *Front. Microbiol.* 10: 2979.
- 977 Wikee, S., L. Lombard, P. W. Crous, C. Nakashima, K. Motohashi *et al.*, 2013a *Phyllosticta*  
978 *capitalensis*, a widespread endophyte of plants. *Fungal Divers.* 60: 91–105.
- 979 Wikee, S., L. Lombard, C. Nakashima, K. Motohashi, E. Chukeatirote *et al.*, 2013b A  
980 phylogenetic re-evaluation of *Phyllosticta* (Botryosphaerales). *Stud. Mycol.* 76: 1–29.
- 981 de Wit, P. J. G. M., R. Mherabi, H. A. Van den burg, and I. Stergiopoulos, 2009 Fungal  
982 effector proteins: past, present and future. *Mol. Plant Pathol.* 10: 735–747.
- 983 Wulandari, N. F., C. To-anun, K. D. Hyde, L. M. Duong, J. de Gruyter *et al.*, 2009  
984 *Phyllosticta citriasiana* sp. nov., the cause of Citrus tan spot of *Citrus maxima* in Asia.  
985 *Fungal Divers.* 34: 23–39.
- 986 Yang, Y., Y. Zhang, B. Li, X. Yang, Y. Dong *et al.*, 2018 A *Verticillium dahliae* pectate lyase  
987 induces plant immune responses and contributes to virulence. *Front. Plant Sci.* 9: 1271.
- 988 Zhang, H., T. Yohe, L. Huang, S. Entwistle, P. Wu *et al.*, 2018 dbCAN2: a meta server for  
989 automated carbohydrate-active enzyme annotation. *Nucleic Acids Res.* 46: W95–  
990 W101.
- 991
- 992
